# Supplementary material for: A high-resolution growth series of Tyrannosaurus rex obtained from multiple lines of evidence
Source: PeerJ journal article supplement (doi:10.7717/peerj.9192), 2020-06-04
Supplement: Supplemental_Data_S4_KT.xlsx [file Supplemental_Data_S4_KT.xlsx]

## Sheet: Sheet1
Growth Stage (node)	Synontomorphy	Exemplar	Ontogenetic change	Phylogenetic change	Homology Decision	Clade rank	Clade
1 (76)	n/a	LACM 28471	n/a		n/a
2 (75)	122 (122. Dentary, drsl rw frmn, grv (PHYLO 234)), 1 0.500 0 ==> 1	AMNH FARB 5050	n/a	1	nonhomologous	n/a	Proceratosauridae
2 (75)	123 (123. Dentary, Mckn grv, dpth (PHYLO 236)), 1 1.000 0 ==> 1	AMNH FARB 5050		n/a	n/a	n/a	n/a
3 (74)	n/a	DDM 344.1	n/a	n/a	n/a	n/a	n/a
4 (73)	85 (85. Frontal, sgttl crst, prsnc (PHYLO 157)), 1 0.667 1 ==> 2	CMNH 7541	low to tall	1, 1 (low to tall)	n/a, homologous	n/a, 11	Proceratosauridae, derived tyrannosaurines
4 (73)	89 (89. Frontal, po bttrss, dstnctvnss (PHYLO 159)) , 1 1.000 0 ==> 1	CMNH 7541	n/a	n/a	n/a	n/a	n/a
4 (73)	940 (940. Frontal, trnstn dtfo to frhd, frm), 1 0.667 0 ==> 1	CMNH 7541	n/a	n/a	n/a	n/a	n/a
5 (72)	4 (4. Orbital fenestra, shp (PHYLO 7)), 1 1.000 0 ==> 1	BMRP 2002.4.1	n/a	n/a	n/a	n/a	n/a
5 (72)	20 (20. Maxilla, antrbtl fssa, rgn blw antrbtl fnstra, hght (PHYLO 35)), 1 0.429 0 ==> 1	BMRP 2002.4.1	n/a	n/a	n/a	n/a	n/a
5 (72)	27 (27. Maxilla, mxllry flng, sz (PHYLO 47)), 1 1.000 0 ==> 1	BMRP 2002.4.1	low to distinct	1 (absent to present)	nonhomologous	n/a	(Timurlengia + Iren Dabasu taxon) + derived tyrannosauroids
5 (72)	55 (55. Jugal, pstrbtl pr, dprssn, prsnc (PHYLO 97)), 1 0.500 0 ==> 1	BMRP 2002.4.1	absent to present	1 (shallow to deep)	nonhomologous	n/a	Daspletosaurus + (Zhuchengtyrannus + Tyrannosaurus)
5 (72)	56 (56. Jugal, pstrbtl pr, dstl end of js (PHYLO 98)), 1 0.500 0 ==> 1	BMRP 2002.4.1	n/a	n/a	n/a	n/a	n/a
5 (72)	57 (57. Jugal, pstrbtl pr, ornttn (PHYLO 101)), 1 1.000 0 ==> 1	BMRP 2002.4.1	n/a	n/a	n/a	n/a	n/a
5 (72)	66 (66. Postorbital, jgl, rms, sbclr pr, prsnc (PHYLO 116)) , 1 1.000 0 ==> 1	BMRP 2002.4.1	n/a	n/a	n/a	n/a	n/a
5 (72)	132 (132. Maxilla, nmbr of tth (PHYLO 261)), 1 0.600 0 ==> 1	BMRP 2002.4.1	15 to 16	1 (13 or more to less than 13)	nonhomologous	n/a	derived tyrannosaurines
5 (72)	133 (133. Dentary, nmbr of alvli (PHYLO 263)), 1 0.571 0 ==> 1	BMRP 2002.4.1	n/a	n/a	n/a	n/a	n/a
5 (72)	215 (215. Bony naris, drsl mrgn), 1 1.000 0 ==> 1	BMRP 2002.4.1	n/a	n/a	n/a	n/a	n/a
5 (72)	224 (224. External antorbital fenestra, vntrl mrgn) , 1 0.500 0 ==> 1	BMRP 2002.4.1	n/a	n/a	n/a	n/a	n/a
5 (72)	226 (226. Internal antorbital fenestra, jgl cntrbtn), 1 1.000 0 ==> 1	BMRP 2002.4.1	n/a	n/a	n/a	n/a	n/a
5 (72)	238 (238. Postorbital bar, jgpstrbtl str), 1 1.000 0 ==> 1	BMRP 2002.4.1	n/a	n/a	n/a	n/a	n/a
5 (72)	239 (239. Postorbital bar, ornttn), 1 1.000 0 ==> 1	BMRP 2002.4.1	n/a	n/a	n/a	n/a	n/a
5 (72)	240 (240. Postorbital bar, pln chng) , 1 1.000 0 ==> 1	BMRP 2002.4.1	n/a	n/a	n/a	n/a	n/a
5 (72)	246 (246. Fossa for ventral pterygoid muscle, dstnctvnss), 1 0.667 0 ==> 1	BMRP 2002.4.1	n/a	n/a	n/a	n/a	n/a
5 (72)	254 (254. Premaxilla, bdy, rstrl mrgn, angltn pstn), 1 1.000 0 ==> 1	BMRP 2002.4.1	n/a	n/a	n/a	n/a	n/a
5 (72)	260 (260. Premaxilla, nsl pr, ornttn), 1 0.500 0 ==> 1	BMRP 2002.4.1	n/a	n/a	n/a	n/a	n/a
5 (72)	275 (275. Premaxilla, alvlr. skrts, prsnc), 1 0.333 0 ==> 1	BMRP 2002.4.1	n/a	n/a	n/a	n/a	n/a
5 (72)	293 (293. Nasal, crss-sctn of rstrl thrd, shp), 1 1.000 0 ==> 1	BMRP 2002.4.1	n/a	n/a	n/a	n/a	n/a
5 (72)	296 (296. Nasal, mdln bmps, nmbr), 1 1.000 1 ==> 2	BMRP 2002.4.1	n/a	n/a	n/a	n/a	n/a
5 (72)	299 (299. Nasal, drsl frmna, nmbr rws), 1 1.000 1 ==> 2	BMRP 2002.4.1	n/a	n/a	n/a	n/a	n/a
5 (72)	315 (315. Nasal, fr rms, drsm, crss sctn), 1 1.000 0 ==> 1	BMRP 2002.4.1	n/a	n/a	n/a	n/a	n/a
5 (72)	332 (332. Maxilla, trct of sbnrl frmn, rstrdrsl frmn, prsnc), 1 0.333 0 ==> 1	BMRP 2002.4.1	n/a	n/a	n/a	n/a	n/a
5 (72)	337 (337. Maxilla, rstrdrsl srfc, frm), 1 0.333 0 ==> 1	BMRP 2002.4.1	n/a	n/a	n/a	n/a	n/a
5 (72)	358 (358. Maxilla, sbctns srf, ornttn to vntrl mrgn), 1 1.000 0 ==> 1	BMRP 2002.4.1	n/a	n/a	n/a	n/a	n/a
5 (72)	373 (373. Maxilla, antrbtl fssa, rstrvntrl crnr, dstnctvnss) , 1 0.500 0 ==> 1	BMRP 2002.4.1	n/a	n/a	n/a	n/a	n/a
5 (72)	374 (374. Maxilla, aofo, dpth rltv to sbctns srfc), 1 0.400 0 ==> 1	BMRP 2002.4.1	n/a	n/a	n/a	n/a	n/a
5 (72)	375 (375. Maxilla, aofo, pstn rgn grtst inst dpth), 1 0.500 0 ==> 1	BMRP 2002.4.1	n/a	n/a	n/a	n/a	n/a
5 (72)	380 (380. Maxilla, aofo, rgn blw intrnl aofen, frm), 1 0.333 0 ==> 1	BMRP 2002.4.1	n/a	n/a	n/a	n/a	n/a
5 (72)	397 (397. Maxilla, nmbr tth ahd of extrnl antrbtl fnstra), 1 0.500 0 ==> 1	BMRP 2002.4.1	n/a	n/a	n/a	n/a	n/a
5 (72)	415 (415. Maxilla, pltl pr, extnt of bny chna), 1 1.000 0 ==> 1	BMRP 2002.4.1	n/a	n/a	n/a	n/a	n/a
5 (72)	492 (492. Lacrimal, rstrvntrl lmna, rstrl mrgn, frm), 1 0.400 0 ==> 1	BMRP 2002.4.1	n/a	n/a	n/a	n/a	n/a
5 (72)	556 (556. Jugal, bdy, dgre of txtr), 1 1.000 0 ==> 1	BMRP 2002.4.1	n/a	n/a	n/a	n/a	n/a
5 (72)	562 (562. Jugal, crnl pr, prmnc), 1 0.500 0 ==> 1	BMRP 2002.4.1	n/a	n/a	n/a	n/a	n/a
5 (72)	570 (570. Jugal, strt ahd of dprssn), 1 0.667 0 ==> 1	BMRP 2002.4.1	n/a	n/a	n/a	n/a	n/a
5 (72)	582 (582. Jugal, js for qj, cntct wth vntrl edg), 1 0.250 0 ==> 1	BMRP 2002.4.1	n/a	n/a	n/a	n/a	n/a
5 (72)	618 (618. Postorbital, drsl mrgn, ornttn), 1 0.250 0 ==> 1	BMRP 2002.4.1	n/a	n/a	n/a	n/a	n/a
5 (72)	620 (620. Postorbital, bdy, drsl mrgn, mdl vw), 1 0.400 0 ==> 1	BMRP 2002.4.1	n/a	n/a	n/a	n/a	n/a
5 (72)	621 (621. Postorbital, bdy, mdl rgsts), 1 1.000 0 ==> 1	BMRP 2002.4.1	n/a	n/a	n/a	n/a	n/a
5 (72)	623 (623. Postorbital, bdy, drsl mrgn, frm, rstrl vw), 1 0.500 0 ==> 1	BMRP 2002.4.1	n/a	n/a	n/a	n/a	n/a
5 (72)	759 (759. Quadratojugal, vntrl qu pr, rdg), 1 0.333 0 ==> 1	BMRP 2002.4.1	n/a	n/a	n/a	n/a	n/a
5 (72)	795 (795. Vomer, bdy, drsl mrgn), 1 0.667 0 ==> 1	BMRP 2002.4.1	n/a	n/a	n/a	n/a	n/a
5 (72)	822 (822. Palatine, pn rcsss, lngth), 1 0.667 0 ==> 1	BMRP 2002.4.1	n/a	n/a	n/a	n/a	n/a
5 (72)	1067 (1067 Dentary, frm, vntrl vw), 1 0.667 0 ==> 1	BMRP 2002.4.1	n/a	n/a	n/a	n/a	n/a
5 (72)	1069 (1069. Dentary, bn, shllwst pnt), 1 1.000 0 ==> 1	BMRP 2002.4.1	n/a	n/a	n/a	n/a	n/a
5 (72)	1144 (1144. Surangular, ltrl scr, txtr & dpth), 1 0.400 0 ==> 1	BMRP 2002.4.1	n/a	n/a	n/a	n/a	n/a
5 (72)	1170 (1170. Prearticular, cdl rms, drsl & vntrl mrgns, ornttn), 1 1.000 0 ==> 1	BMRP 2002.4.1	n/a	n/a	n/a	n/a	n/a
5 (72)	1173 (1173. Prearticular, rstrl rms, frm), 1 1.000 0 ==> 1	BMRP 2002.4.1	n/a	n/a	n/a	n/a	n/a
5 (72)	1176 (1176. Dentition, frst mxllry tth, frm), 1 1.000 0 ==> 1	BMRP 2002.4.1	n/a	n/a	n/a	n/a	n/a
6 (71)	37 (37. Lacrimal, bn, shp (PHYLO 65)), 1 1.000 0 ==> 1	BMRP 2006.4.4 + RSM 2990.1	n/a	n/a	n/a	n/a	n/a
6 (71)	38 (38. Lacrimal, crnl pr, apx, shp (PHYLO 66)), 1 1.000 1 ==> 2	BMRP 2006.4.4 + RSM 2990.1	n/a	n/a	n/a	n/a	n/a
6 (71)	40 (40. Lacrimal, hght abv lpr (PHYLO 69)), 1 1.000 0 ==> 1	BMRP 2006.4.4 + RSM 2990.1	shallow to deep	0 (short to tall)	homologous	8	Bistahieversor + derived tyrannosauroids
6 (71)	41 (41. Lacrimal, rstrl rms, infltn (PHYLO 75)), 1 1.000 0 ==> 1	BMRP 2006.4.4 + RSM 2990.1	n/a	n/a	n/a	n/a	n/a
6 (71)	44 (44. Lacrimal, mdl pnmtc rcss, prsnc (PHYLO 79)), 1 1.000 0 ==> 1	BMRP 2006.4.4 + RSM 2990.1	n/a	n/a	n/a	n/a	n/a
6 (71)	45 (45. Lacrimal, sprrbtl rms, lngth (PHYLO 82)), 1 1.000 0 ==> 1	BMRP 2006.4.4 + RSM 2990.1	n/a	n/a	n/a	n/a	n/a
6 (71)	46 (46. Lacrimal, sprrbtl pr, infltn (PHYLO 82)), 1 1.000 0 ==> 1	BMRP 2006.4.4 + RSM 2990.1	n/a	n/a	n/a	n/a	n/a
6 (71)	159 (159. Humerus, dltpctrl crst, dltd mscl scr, dstl nd, frm & txt (PHYLO 309)), 1 0.500 0 ==> 1	BMRP 2006.4.4 + RSM 2990.1	n/a	n/a	n/a	n/a	n/a
6 (71)	198 (198. Scapula, glnd fssa, ornttn (PHYLO R03 135)), 1 0.667 0 ==> 1	BMRP 2006.4.4 + RSM 2990.1	n/a	n/a	n/a	n/a	n/a
6 (71)	219 (219. Snout, drsm, wdth cdl end), 1 1.000 0 ==> 1	BMRP 2006.4.4 + RSM 2990.1	n/a	n/a	n/a	n/a	n/a
6 (71)	430 (430. Lacrimal, crs ptch cddrsl to lpr, prsnc), 1 0.667 0 ==> 1	BMRP 2006.6.4 + RSM 2990.1	n/a	n/a	n/a	n/a	n/a
6 (71)	433 (433. Lacrimal, drsl rms, mdl ede, frm) , 1 1.000 0 ==> 1	BMRP 2006.4.4 + RSM 2990.1	n/a	n/a	n/a	n/a	n/a
6 (71)	434 (434. Lacrimal, mdl fssa, rstrl rdg, prsnc), 1 1.000 0 ==> 1	BMRP 2006.4.4 + RSM 2990.1	n/a	n/a	n/a	n/a	n/a
6 (71)	436 (436. Lacrimal, drsl rms, cnchl srfc, drsl rdg, dpth of cdl prt), 1 1.000 0 ==> 1	BMRP 2006.4.4 + RSM 2990.1	n/a	n/a	n/a	n/a	n/a
6 (71)	437 (437. Lacrimal, drsl rms, cnchl srfc, dpth) , 1 0.500 0 ==> 1	BMRP 2006.4.4 + RSM 2990.1	n/a	n/a	n/a	n/a	n/a
6 (71)	440 (440. Lacrimal, drsl rms, prfntnsl js abv cnchl srfc), 2 0.500 0 ==> 2	BMRP 2006.4.4 + RSM 2990.1	n/a	n/a	n/a	n/a	n/a
6 (71)	447 (447. Lacrimal, drsl rms, rgn drsl & rstrdrsl to lcrml rcss, frm), 1 1.000 0 ==> 1	BMRP 2006.4.4 + RSM 2990.1	n/a	n/a	n/a	n/a	n/a
6 (71)	450 (450. Lacrimal, cnchl srfc, cddrsl srfc, frm), 1 0.500 0 ==> 1	BMRP 2006.4.4 + RSM 2990.1	n/a	n/a	n/a	n/a	n/a
6 (71)	453 (453. Lacrimal, crnl pr, prsnc), 1 0.500 0 ==> 1	BMRP 2006.4.4 + RSM 2990.1	n/a	n/a	n/a	n/a	n/a
6 (71)	454 (454. Lacrimal, crnl pr, ltrl extnt), 1 1.000 0 ==> 1	BMRP 2006.4.4 + RSM 2990.1	n/a	n/a	n/a	n/a	n/a
6 (71)	455 (455. Lacrimal, lpr, frmn in vntrl mrgn, prsnc), 1 1.000 0 ==> 1	BMRP 2006.4.4 + RSM 2990.1	n/a	n/a	n/a	n/a	n/a
6 (71)	459 (459. Lacrimal, sptm rstrl to lpr, infltn), 1 0.667 0 ==> 1	BMRP 2006.4.4 + RSM 2990.1	n/a	n/a	n/a	n/a	n/a
6 (71)	461 (461. Lacrimal rgn cdl to lpr, lngth & dpth), 1 1.000 0 ==> 1	BMRP 2006.4.4 + RSM 2990.1	n/a	n/a	n/a	n/a	n/a
6 (71)	462 (462. Lacrimal, lngth lpr rltv to rgn bhnd it) , 1 1.000 0 ==> 1	BMRP 2006.4.4 + RSM 2990.1	n/a	n/a	n/a	n/a	n/a
6 (71)	464 (464. Lacrimal, rstrl rms, rstrdrsl mrgn), 1 0.667 0 ==> 1	BMRP 2006.4.4 + RSM 2990.1	n/a	n/a	n/a	n/a	n/a
6 (71)	465 (465. Lacrimal, rstrl rmas, sbctns srfc hght), 1 1.000 0 ==> 1	BMRP 2006.4.4 + RSM 2990.1	n/a	n/a	n/a	n/a	n/a
6 (71)	466 (466. Lacrimal, jnctn aofo & sbct srfc ahd of rcss), 1 1.000 0 ==> 1	BMRP 2006.4.4 + RSM 2990.1	n/a	n/a	n/a	n/a	n/a
6 (71)	468 (468. Lacrimal, rgn btwn lpr sptm & dstl rcss), 1 1.000 0 ==> 1	BMRP 2006.4.4 + RSM 2990.1	n/a	n/a	n/a	n/a	n/a
6 (71)	469 (469. Lacrimal, sptm btwn acc rccses, lngth), 1 0.333 0 ==> 1	BMRP 2006.4.4 + RSM 2990.1	n/a	n/a	n/a	n/a	n/a
6 (71)	470 (470. Lacrimal, pnmtc rss, prxmty to mxlla), 1 1.000 0 ==> 1	BMRP 2006.4.4 + RSM 2990.1	n/a	n/a	n/a	n/a	n/a
6 (71)	471 (471. Lacrimal, dstl accssry rcss, frm), 1 0.600 0 ==> 1	BMRP 2006.4.4 + RSM 2990.1	n/a	n/a	n/a	n/a	n/a
6 (71)	473 (473. Lacrimal, rstrl rms, cvrg by cdltrl pr of nsl), 1 0.500 0 ==> 1	BMRP 2006.4.4 + RSM 2990.1	n/a	n/a	n/a	n/a	n/a
6 (71)	474 (474. Lacrimal, rstrl rms, mdl jnt srfcs, hght), 1 1.000 0 ==> 1	BMRP 2006.4.4 + RSM 2990.1	n/a	n/a	n/a	n/a	n/a
6 (71)	475 (475. Lacrimal, js cdl to mdl tb, frm), 1 0.500 0 ==> 1	BMRP 2006.4.4 + RSM 2990.1	n/a	n/a	n/a	n/a	n/a
6 (71)	476 (476. Lacrimal, mdl tb, drsl mrgn), 1 1.000 0 ==> 1	BMRP 2006.4.4 + RSM 2990.1	n/a	n/a	n/a	n/a	n/a
6 (71)	477 (477. Lacrimal, rstrdrsl pr, dv hght), 1 1.000 0 ==> 1	BMRP 2006.4.4 + RSM 2990.1	n/a	n/a	n/a	n/a	n/a
6 (71)	479 (479. Lacrimal, rstrvrtrl pr, pstn), 1 1.000 0 ==> 1	BMRP 2006.4.4 + RSM 2990.1	n/a	n/a	n/a	n/a	n/a
6 (71)	480 (480. Lacrimal, rstrvntrl pr, lngth), 1 0.400 0 ==> 1	BMRP 2006.4.4 + RSM 2990.1	n/a	n/a	n/a	n/a	n/a
6 (71)	481 (481. Lacrimal, mxllry pr, hgt), 1 1.000 0 ==> 1	BMRP 2006.4.4 + RSM 2990.1	n/a	n/a	n/a	n/a	n/a
6 (71)	482 (482. Lacrimal, cdltrl shlf, frm), 1 1.000 1 ==> 2	BMRP 2006.4.4 + RSM 2990.1	n/a	n/a	n/a	n/a	n/a
6 (71)	485 (485. Lacrimal, sprrbtl rms, wdth, drsl vw), 1 1.000 1 ==> 2	BMRP 2006.4.4 + RSM 2990.1	n/a	n/a	n/a	n/a	n/a
6 (71)	487 (487. Lacrimal, sprrbtl rms, mdl pr, prsnc), 1 1.000 0 ==> 1	BMRP 2006.4.4 + RSM 2990.1	n/a	n/a	n/a	n/a	n/a
6 (71)	489 (489. Lacrimal, frontl pr, grv on drsl srrfc, prsnc), 1 1.000 0 ==> 1	BMRP 2006.4.4 + RSM 2990.1	n/a	n/a	n/a	n/a	n/a
6 (71)	493 (493. Lacrimal, mdl pnmtc rcss, cdvntrl mrgn), 1 0.500 0 ==> 1	BMRP 2006.4.4 + RSM 2990.1	n/a	n/a	n/a	n/a	n/a
6 (71)	502 (502. Lacrimal, orbtnsl rdg, prxml & dstl wdth), 1 1.000 0 ==> 1	BMRP 2006.4.4 + RSM 2990.1	n/a	n/a	n/a	n/a	n/a
6 (71)	503 (503. Lacrimal, orbtnsl rdg, bckswpt cdl edg), 1 1.000 0 ==> 1	BMRP 2006.4.4 + RSM 2990.1	n/a	n/a	n/a	n/a	n/a
6 (71)	504 (504. Lacrimal, orbtnsl rdg, mdltrl wdth), 1 1.000 0 ==> 1	BMRP 2006.4.4 + RSM 2990.1	n/a	n/a	n/a	n/a	n/a
6 (71)	509 (509. Lacrimal, orbtnsl rdg, cntct with vntrl rms), 1 1.000 0 ==> 1	BMRP 2006.4.4 + RSM 2990.1	n/a	n/a	n/a	n/a	n/a
6 (71)	510 (510. Lacrimal, orbtnsl rdg, crld edg, prxmty to cdl edg), 1 1.000 0 ==> 1	BMRP 2006.4.4 + RSM 2990.1	n/a	n/a	n/a	n/a	n/a
6 (71)	511 (511. Lacrimal, orbtnsl rdg, pnt rstrvntrl), 1 1.000 0 ==> 1	BMRP 2006.4.4 + RSM 2990.1	n/a	n/a	n/a	n/a	n/a
6 (71)	517 (517. Lacrimal, vntrl rms, prxml to dstl ends), 1 1.000 0 ==> 1	BMRP 2006.4.4 + RSM 2990.1	n/a	n/a	n/a	n/a	n/a
6 (71)	522 (522. Lacrimal, vntrl rms, rstrdorsal mrgn, frm), 1 0.200 0 ==> 1	BMRP 2006.4.4 + RSM 2990.1	n/a	n/a	n/a	n/a	n/a
6 (71)	524 (524. Lacrimal, vntrl rms, sbctns srfc, cdl extnsn), 1 1.000 0 ==> 1	BMRP 2006.4.4 + RSM 2990.1	n/a	n/a	n/a	n/a	n/a
6 (71)	526 (526. Lacrimal, vntrl rms, rstrvntrl mrgn), 1 0.500 0 ==> 1	BMRP 2006.4.4 + RSM 2990.1	n/a	n/a	n/a	n/a	n/a
6 (71)	1546 (1546. Scapulocoracoid, acrml rgn, ltrl srfc, frm), 1 1.000 0 ==> 1	BMRP 2006.4.4 + RSM 2990.1	n/a	n/a	n/a	n/a	n/a
6 (71)	1548 (1548. Scapula, glnd, wdth js rltv to shft), 1 1.000 0 ==> 1	BMRP 2006.4.4 + RSM 2990.1	n/a	n/a	n/a	n/a	n/a
6 (71)	1549 (1549. Scapula, glnd, antrltrl crnr, frm), 1 1.000 0 ==> 1	BMRP 2006.4.4 + RSM 2990.1	n/a	n/a	n/a	n/a	n/a
6 (71)	1551 (1551. Scapula, acrmn, mdl srfc, frm), 1 1.000 0 ==> 1	BMRP 2006.4.4 + RSM 2990.1	n/a	n/a	n/a	n/a	n/a
6 (71)	1561 (1561. Scapula, mscl scr alng drsl edg, dstnctvnss), 1 1.000 0 ==> 1	BMRP 2006.4.4 + RSM 2990.1	n/a	n/a	n/a	n/a	n/a
6 (71)	1565 (1565. Scapula, shft, rdg on ltrl srfc of prxml end of expnded rgn, prsnc), 1 0.500 0 ==> 1	BMRP 2006.4.4 + RSM 2990.1	n/a	n/a	n/a	n/a	n/a
6 (71)	1574 (1574. Coracoid, glnd, ornttn), 1 1.000 0 ==> 1	BMRP 2006.4.4 + RSM 2990.1	n/a	n/a	n/a	n/a	n/a
6 (71)	1576 (1576. Coracoid, glnd, sptrtn frm crcd pr, dstnctvnss) , 1 1.000 0 ==> 1	BMRP 2006.4.4 + RSM 2990.1	n/a	n/a	n/a	n/a	n/a
6 (71)	1577 (1577. Coracoid, lw rdg that extnds antrrly frm bcps tbrcl, prsnc), 1 1.000 0 ==> 1	BMRP 2006.4.4 + RSM 2990.1	n/a	n/a	n/a	n/a	n/a
6 (71)	1581 (1581. Coracoid, vntrl hlf of bn, frm), 1 1.000 0 ==> 1	BMRP 2006.4.4 + RSM 2990.1	n/a	n/a	n/a	n/a	n/a
6 (71)	1584 (1584. Coracoid, mdl fssa btwn crcd frmn & antrr edge of bn), 1 1.000 0 ==> 1	BMRP 2006.4.4 + RSM 2990.1	n/a	n/a	n/a	n/a	n/a
6 (71)	1707 (1707. D II, PH 2, prxml js, vntrl mrgn, frm), 1 1.000 0 ==> 1	BMRP 2006.4.4 + RSM 2990.1	n/a	n/a	n/a	n/a	n/a
6 (71)	1711 (1711. D II, PH 2, ltrl dstl cndyl, ornttn, ltrl vw), 1 1.000 0 ==> 1	BMRP 2006.4.4 + RSM 2990.1	n/a	n/a	n/a	n/a	n/a
6 (71)	1712 (1712. D II, PH 2, mdl dstl cndyl, elvtn), 1 1.000 0 ==> 1	BMRP 2006.4.4 + RSM 2990.1	n/a	n/a	n/a	n/a	n/a
6 (71)	1714 (1714. D II, PH 2, prxmdrsl flng, wdth), 1 1.000 0 ==> 1	BMRP 2006.4.4 + RSM 2990.1	n/a	n/a	n/a	n/a	n/a
6 (71)	1715 (1715. D II, PH 2, mdl dstl cndyl, mdl mrgn, ornttn), 1 1.000 0 ==> 1	BMRP 2006.4.4 + RSM 2990.1	n/a	n/a	n/a	n/a	n/a
6 (71)	1719 (1719. D II, PH 2, mdl dstl cndyl, vntrl extnt), 1 1.000 0 ==> 1	BMRP 2006.4.4 + RSM 2990.1	n/a	n/a	n/a	n/a	n/a
6 (71)	1748 (1748. D III, PH 1, prxml js, frm), 1 1.000 0 ==> 1	BMRP 2006.4.4 + RSM 2990.1	n/a	n/a	n/a	n/a	n/a
6 (71)	1754 (1754. D III, PH 1, ltrl clltrl lgmnt pt, frm), 1 1.000 0 ==> 1	BMRP 2006.4.4 + RSM 2990.1	n/a	n/a	n/a	n/a	n/a
6 (71)	1782 (1782. D IV, PH 1, vntrmdl cndyl, angl rltv to shft), 1 1.000 0 ==> 1	BMRP 2006.4.4 + RSM 2990.1	n/a	n/a	n/a	n/a	n/a
6 (71)	1784 (1784. D IV, PH 1, prxml js, vntrl ntch, mdltrl pstn), 1 1.000 0 ==> 1	BMRP 2006.4.4 + RSM 2990.1	n/a	n/a	n/a	n/a	n/a
6 (71)	1787 (1787. D IV, PH 1, dstl js, prprtns), 1 1.000 0 ==> 1	BMRP 2006.4.4 + RSM 2990.1	n/a	n/a	n/a	n/a	n/a
6 (71)	1790 (1790. D IV, PH 1, scr on shft ahd of prxml end, prmnnc), 1 1.000 0 ==> 1	BMRP 2006.4.4 + RSM 2990.1	n/a	n/a	n/a	n/a	n/a
6 (71)	1792 (1792. D IV, PH 1, drsltrl srfc, frm), 1 1.000 0 ==> 1	BMRP 2006.4.4 + RSM 2990.1	n/a	n/a	n/a	n/a	n/a
6 (71)	1793 (1793. D IV, PH 1, shft, rdg ltrl to sprcndylr pt, frm) , 1 1.000 0 ==> 1	BMRP 2006.4.4 + RSM 2990.1	n/a	n/a	n/a	n/a	n/a
6 (71)	1806 (1806. D IV, PH 3, frm), 1 1.000 0 ==> 1	BMRP 2006.4.4 + RSM 2990.1	n/a	n/a	n/a	n/a	n/a
6 (71)	1809 (1809. D IV, PH 3, rtio of mdltrl wdth to dv hght), 1 1.000 0 ==> 1	BMRP 2006.4.4 + RSM 2990.1	n/a	n/a	n/a	n/a	n/a
6 (71)	1811 (1811. D IV, PH 3, ltrl cdltrl lgmnt pt, dpth), 1 0.500 0 ==> 1	BMRP 2006.4.4 + RSM 2990.1	n/a	n/a	n/a	n/a	n/a
6 (71)	1815 (1815. D IV, PH 3, flxr mscl scr, frm), 1 1.000 0 ==> 1	BMRP 2006.4.4 + RSM 2990.1	n/a	n/a	n/a	n/a	n/a
6 (71)	1817 (1817. D IV PH 4, drsm, frm), 1 1.000 0 ==> 1	BMRP 2006.4.4 + RSM 2990.1	n/a	n/a	n/a	n/a	n/a
6 (71)	1818 (1818. D IV PH 4, drsm, mdltrl ornttn), 1 1.000 0 ==> 1	BMRP 2006.4.4 + RSM 2990.1	n/a	n/a	n/a	n/a	n/a
6 (71)	1819 (1819. D IV PH 4, prxml end, wdth rltv to dstl end), 1 0.500 0 ==> 1	BMRP 2006.4.4 + RSM 2990.1	n/a	n/a	n/a	n/a	n/a
6 (71)	1820 (1820. D IV PH 4, dstl js, frm), 1 1.000 0 ==> 1	BMRP 2006.4.4 + RSM 2990.1	n/a	n/a	n/a	n/a	n/a
6 (71)	1824 (1824. D IV PH 4, dstl js, drsl mrgn, indttn, prsnc), 1 1.000 0 ==> 1	BMRP 2006.4.4 + RSM 2990.1	n/a	n/a	n/a	n/a	n/a
6 (71)	1826 (1826. D IV PH 4, dstl cndylr rgn, pstrr mrgn, undrct), 1 1.000 0 ==> 1	BMRP 2006.4.4 + RSM 2990.1	n/a	n/a	n/a	n/a	n/a
6 (71)	1848 (1848. Growth rings, nmbr), 1 1.000 2 ==> 3	BMRP 2006.4.4 + RSM 2990.1	n/a	n/a	n/a	n/a	n/a
7 (70)	39 (39. Lacrimal, crnl pr, apx, prsnc (PHYLO 68)), 1 0.500 1 ==> 2	LACM 23845	present to absent	1 (absent to present)	nonhomologous	n/a	Tyrannosauridae
7 (70)	41 (41. Lacrimal, rstrl rms, infltn (PHYLO 75)) , 1 1.000 1 ==> 2	LACM 23845	n/a	n/a	n/a	n/a	n/a
7 (70)	43 (43. Lacrimal, nmbr of rcss ahd of lpr (PHYLO 78)), 1 1.000 0 ==> 1	LACM 23845	n/a	n/a	n/a	n/a	n/a
7 (70)	453 (453. Lacrimal, crnl pr, prsnc), 1 0.500 1 ==> 2	LACM 23845	n/a	n/a	n/a	n/a	n/a
7 (70)	471 (471. Lacrimal, dstl accssry rcss, frm), 1 0.600 1 ==> 2	LACM 23845	n/a	n/a	n/a	n/a	n/a
7 (70)	526 (526. Lacrimal, vntrl rms, rstrvntrl mrgn), 1 0.500 1 ==> 2	LACM 23845	n/a	n/a	n/a	n/a	n/a
7 (70)	1550 (1550. Scapula, lp of glnd, emrgnc frm vntrl edg, frm) , 1 1.000 0 ==> 1	LACM 23845	n/a	n/a	n/a	n/a	n/a
7 (70)	1564 (1564. Scapula, shft, wst btwn acrmn & flt rgn of shft, dstnctvnss), 1 0.500 0 ==> 1	LACM 23845	n/a	n/a	n/a	n/a	n/a
7 (70)	1568 (1568. Scapula, shft, vntrl srfc adjcnt to glnd, ornttn), 1 1.000 0 ==> 1	LACM 23845	n/a	n/a	n/a	n/a	n/a
7 (70)	1572 (1572. Coracoid, crcd frmn, ornttn) , 1 0.500 0 ==> 1	LACM 23845	n/a	n/a	n/a	n/a	n/a
7 (70)	1583 (1583. Coracoid pr, lngth, dpth & crvtr), 1 1.000 0 ==> 1	LACM 23845	n/a	n/a	n/a	n/a	n/a
7 (70)	1779 (1779. D IV, PH 1, sprcndylr pt, frm) , 1 1.000 0 ==> 1	LACM 23845	n/a	n/a	n/a	n/a	n/a
7 (70)	1808 (1808. D IV, PH 3, drsm, sprcndylr pt, frm), 1 0.500 0 ==> 1	LACM 23845	n/a	n/a	n/a	n/a	n/a
7 (70)	1810 (1810. D IV, PH 3, prxml js, mdl mrgn, frm), 1 1.000 0 ==> 1	LACM 23845	n/a	n/a	n/a	n/a	n/a
7 (70)	1812 (1812. D IV, PH 3, mdl clltrl lgmnt pt, dpth), 1 1.000 0 ==> 1	LACM 23845	n/a	n/a	n/a	n/a	n/a
7 (70)	1814 (1814. D IV, PH 3, dstl cndyls, dvrgnc), 1 1.000 0 ==> 1	LACM 23845	n/a	n/a	n/a	n/a	n/a
8 (69)	88 (88. Frontal, rtio sggtl crst to bn lngth (PHYLO 158)), 1 0.500 0 ==> 1	MOR 1125	short to long	1 (n/a), 1 (short to long)	n/a, homologous	n/a, 11	Proceratosauridae, derived tyrannosaurines
8 (69)	90 (90. Frontal, orbtl ntch, frm, ltrl vw (PHYLO 160)), 1 0.400 0 ==> 1	MOR 1125	n/a	n/a	n/a	n/a	n/a
8 (69)	492 (492. Lacrimal, rstrvntrl lmna, rstrl mrgn, frm), 1 0.400 1 ==> 2	MOR 1125	n/a	n/a	n/a	n/a	n/a
8 (69)	523 (523. Lacrimal, sbctns srfc, txtr), 1 1.000 0 ==> 1	MOR 1125	n/a	n/a	n/a	n/a	n/a
8 (69)	651 (651. Postorbital, jgl rms, wdth, cdl), 1 1.000 0 ==> 1	MOR 1125	n/a	n/a	n/a	n/a	n/a
8 (69)	737 (737. Quadratojugal, sq pr, rdg, wdth), 1 1.000 0 ==> 1	MOR 1125	n/a	n/a	n/a	n/a	n/a
8 (69)	741 (741. Quadratojugal, drsl js for qu, txtr & dpth), 1 1.000 0 ==> 1	MOR 1125	n/a	n/a	n/a	n/a	n/a
8 (69)	742 (742. Quadratojugal, drsl js for qu, rstrl mrgn, frm), 1 1.000 0 ==> 1	MOR 1125	n/a	n/a	n/a	n/a	n/a
8 (69)	743 (743. Quadratojugal, drsl js for qu, cdl hlf, frm A), 1 0.500 0 ==> 1	MOR 1125	n/a	n/a	n/a	n/a	n/a
8 (69)	882 (882. Frontals, prprtns appsd bns), 1 1.000 0 ==> 1	MOR 1125	n/a	n/a	n/a	n/a	n/a
8 (69)	886 (886. Frontal, nsl rms, js fr msthmd, frm), 1 0.500 1 ==> 2	MOR 1125	n/a	n/a	n/a	n/a	n/a
8 (69)	913 (913. Frontal, js for the prfrntl, rstrcdl pstn), 1 1.000 0 ==> 1	MOR 1125	n/a	n/a	n/a	n/a	n/a
8 (69)	927 (927. Frontal, sgttl frmn, pstn rltv to dtfo), 2 0.667 0 ==> 2	MOR 1125	n/a	n/a	n/a	n/a	n/a
8 (69)	931 (931. Frontal, orbtl srfc, mdl mrgn, ornttn) , 1 1.000 1 ==> 2	MOR 1125	n/a	n/a	n/a	n/a	n/a
8 (69)	965 (965. Parietal, sgttl crst, cdl end), 1 0.250 0 ==> 1	MOR 1125	n/a	n/a	n/a	n/a	n/a
8 (69)	968 (968. Parietal, nchl crst, txtr), 1 0.500 0 ==> 1	MOR 1125	n/a	n/a	n/a	n/a	n/a
8 (69)	971 (971. Parietal, frntprtl jnctn at sgttl crst, wdth), 1 0.500 0 ==> 1	MOR 1125	n/a	n/a	n/a	n/a	n/a
8 (69)	974 (974. Parietal, nchl crst, mdln strt), 1 0.500 0 ==> 1	MOR 1125	n/a	n/a	n/a	n/a	n/a
8 (69)	1111 (1111. Dentary, vntrl br, dpth blw Mckln fssa), 1 1.000 0 ==> 1	MOR 1125	n/a	n/a	n/a	n/a	n/a
8 (69)	1130 (1130. Splenial, js for dn blw rmf), 1 0.667 0 ==> 1	MOR 1125	n/a	n/a	n/a	n/a	n/a
8 (69)	1168 (1168. Angular, 2ndry rdg, frm), 1 1.000 0 ==> 1	MOR 1125	n/a	n/a	n/a	n/a	n/a
8 (69)	1647 (1647. Fibula, rtio of mdhght lngth to ttl hght), 1 1.000 0 ==> 1	MOR 1125	n/a	n/a	n/a	n/a	n/a
8 (69)	1653 (1653. Fibula, prxml end, antrr end, frm), 2 0.667 0 ==> 2	MOR 1125	n/a	n/a	n/a	n/a	n/a
8 (69)	1657 (1657. Fibula, prxml end, drsl mrgn, frm), 1 1.000 0 ==> 1	MOR 1125	n/a	n/a	n/a	n/a	n/a
8 (69)	1664 (1664. Fibula, antrr srfc, dstl end, frm), 1 0.500 0 ==> 1	MOR 1125	n/a	n/a	n/a	n/a	n/a
8 (69)	1672 (1672. Fibula, antrr srfc prxml srfc to bprtt scr), 1 1.000 1 ==> 2	MOR 1125	n/a	n/a	n/a	n/a	n/a
8 (69)	1675 (1675. Fibula, mdl fssa, dffrntn), 1 1.000 0 ==> 1	MOR 1125	n/a	n/a	n/a	n/a	n/a
8 (69)	1679 (1679. Fibula, mdl fssa, pstrr extnt), 1 0.500 0 ==> 1	MOR 1125	n/a	n/a	n/a	n/a	n/a
8 (69)	1683 (1683. Fibula, vntrl end blw lvl of bprtt scr, frm), 1 1.000 0 ==> 1	MOR 1125	n/a	n/a	n/a	n/a	n/a
8 (69)	1684 (1684. Fibula, prxml end of bn abv bprtt scr, pstrr edg), 1 0.667 0 ==> 1	MOR 1125	n/a	n/a	n/a	n/a	n/a
8 (69)	1848 (1848. Growth rings, nmbr) , 1 1.000 3 ==> 4	MOR 1125	n/a	n/a	n/a	n/a	n/a
9 (68)	15 (15. Maxilla, mxllry fnstra, dv pstn (PHYLO 23)), 1 0.333 1 ==> 0	TMP 1981.006.0001	dorsal to ventral	1 (dorsal to ventral)	homologous	14	Tyrannosaurus
9 (68)	18 (18. Maxilla, intrfnstrl strt, lngth (PHYLO 31)), 1 1.000 0 ==> 1	TMP 1981.006.0001	wide to narrow	1 (wide to narrow)	homologous	9	Tyrannosauridae
9 (68)	24 (24. Maxilla, alvlr pr, sbctns srfc, fssae (PHYLO 44)), 1 1.000 0 ==> 1	TMP 1981.006.0001	absent to present	1 (absent to present)	homologous	13	Zhuchengtyrannus + Tyrannosaurus
9 (68)	109 (109. Otoccipital, prccptl pr, cdl srfc, frm (PHYLO 200)), 1 1.000 0 ==> 1	TMP 1981.006.0001	n/a	n/a	n/a	n/a	n/a
9 (68)	117 (117. Dentary, chn, pstn (PHYLO 229)), 1 0.250 0 ==> 1	TMP 1981.006.0001	n/a	0	n/a	n/a	Daspletosaurus
9 (68)	121 (121. Dentary, msl alvli, sz (PHYLO 233)), 1 0.500 0 ==> 1	TMP 1981.006.0001	first two teeth to first only	1 (first two teeth smaller)	n/a	n/a	Tyrannosauroidea
9 (68)	133 (133. Dentary, nmbr of alvli (PHYLO 263)) , 1 0.571 2 ==> 3	TMP 1981.006.0001	n/a	n/a	n/a	n/a	n/a
9 (68)	350 (350. Maxilla, ascndng rms, drsl & vntrl mrgn), 1 0.500 0 ==> 1	TMP 1981.006.0001	n/a	n/a	n/a	n/a	n/a
9 (68)	371 (371. Maxilla, mxllry fnstra, cddrsl mrgn, frm), 1 0.200 0 ==> 1	TMP 1981.006.0001	n/a	n/a	n/a	n/a	n/a
9 (68)	372 (372. Maxilla, mxllry fnstra, vntrl mrgn, prsnc) , 1 0.333 0 ==> 1	TMP 1981.006.0001	n/a	n/a	n/a	n/a	n/a
9 (68)	376 (376. Maxilla, antrbtl fssa, mdltral dpth), 1 1.000 0 ==> 1	TMP 1981.006.0001	n/a	n/a	n/a	n/a	n/a
9 (68)	396 (396. Maxilla, intrnl antrbtl fnstra, pnt rstrl incrsn, rltv to tth), 1 0.667 1 ==> 2	TMP 1981.006.0001	n/a	n/a	n/a	n/a	n/a
9 (68)	658 (658. Postorbital, jgl rms, sbclr pr, lngth), 1 0.667 1 ==> 2	TMP 1981.006.0001	n/a	n/a	n/a	n/a	n/a
9 (68)	717 (717. Squamosal, dtfo, ltrl hlf, txtr), 1 1.000 0 ==> 1	TMP 1981.006.0001	n/a	n/a	n/a	n/a	n/a
9 (68)	1003 (1003. Otoccipital, sbcndylr fssa, prsnc), 1 0.667 1 ==> 2	TMP 1981.006.0001	n/a	n/a	n/a	n/a	n/a
9 (68)	1042 (1042. Basisphenoid, ovl scr, ornttn), 1 0.500 0 ==> 1	TMP 1981.006.0001	n/a	n/a	n/a	n/a	n/a
10 (67)	20 (20. Maxilla, antrbtl fssa, rgn blw antrbtl fnstra, hght (PHYLO 35)), 1 0.429 2 ==> 3	LACM 150167	n/a	n/a	n/a	n/a	n/a
10 (67)	26 (26. Maxilla, crcmfssa rdg, prsnc (PHYLO 45)), 1 0.333 0 ==> 1	LACM 150167	present to absent	1 (present to absent)	homologous	3	Stokesosaurids' + derived tyrannosauroids
10 (67)	65 (65. Postorbital, crnl pr, hght (PHYLO 111)), 1 0.500 0 ==> 1	LACM 150167	does not exceed to exceeds	0 (exceeds to does not exceed)	nonhomologous	n/a	Tyrannosauridae
10 (67)	253 (253. Premaxilla, ltrl mrgn, frm), 1 1.000 0 ==> 1	LACM 150167	n/a	n/a	n/a	n/a	n/a
10 (67)	379 (379. Maxilla, antrbtl fssa, hght blw intrnl antrbtl fnstra), 1 0.333 1 ==> 0	LACM 150167	n/a	n/a	n/a	n/a	n/a
10 (67)	472 (472. Lacrimal, sbctns ala, drctn), 1 0.333 0 ==> 1	LACM 150167	n/a	n/a	n/a	n/a	n/a
10 (67)	583 (583. Jugal, js for qj, prxmty to crnl pr), 2 0.400 0 ==> 2	LACM 150167	n/a	n/a	n/a	n/a	n/a
10 (67)	1017 (1017. Subcondylar recesses, dstnc frm ea othr), 1 1.000 0 ==> 1	LACM 150167	n/a	n/a	n/a	n/a	n/a
10 (67)	1042 (1042. Basisphenoid, ovl scr, ornttn), 1 0.500 1 ==> 2	LACM 150167	n/a	n/a	n/a	n/a	n/a
10 (67)	1043 (1043. Basisphenoid, ovl scr, txtr), 1 1.000 1 ==> 2	LACM 150167	n/a	n/a	n/a	n/a	n/a
10 (67)	1055 (1055. Supraoccipital, bar acrss ltrl prs, prmnnc), 1 1.000 0 ==> 1	LACM 150167	n/a	n/a	n/a	n/a	n/a
10 (67)	1082 (1082. Dentary, chn, sbctns srfc, txtr), 1 1.000 0 ==> 1	LACM 150167	n/a	n/a	n/a	n/a	n/a
11 (66)	923 (923. Frontal, cdl shlf, ornttn), 1 0.500 0 ==> 1	AMNH FARB 5117	n/a	n/a	n/a	n/a	n/a
11 (66)	945 (945. Frontal, grv acrss prfntlcrml pr, prsnc & dpth) , 1 0.500 0 ==> 1	AMNH FARB 5117	n/a	n/a	n/a	n/a	n/a
11 (66)	965 (965. Parietal, sgttl crst, cdl end), 1 0.250 1 ==> 0	AMNH FARB 5117	n/a	n/a	n/a	n/a	n/a
11 (66)	968 (968. Parietal, nchl crst, txtr), 1 0.500 1 ==> 2	AMNH FARB 5117	n/a	n/a	n/a	n/a	n/a
11 (66)	978 (978. Parietal, nchl crst, cncvty, drsl extnt), 1 0.333 0 ==> 1	AMNH FARB 5117	n/a	n/a	n/a	n/a	n/a
11 (66)	1000 (1000. Laterosphenoidoprootic str, rdg), 1 0.500 0 ==> 1	AMNH FARB 5117	n/a	n/a	n/a	n/a	n/a
11 (66)	1014 (1014. Otoccipital, mttc strt, ovl scr cmplx, prtcptn), 1 1.000 0 ==> 1	AMNH FARB 5117	n/a	n/a	n/a	n/a	n/a
11 (66)	1025 (1025. Basioccipital, bsl tbr, txtr), 1 0.667 1 ==> 2	AMNH FARB 5117	n/a	n/a	n/a	n/a	n/a
11 (66)	1030 (1030. Basioccipital, occ con, nck, frm), 1 0.600 1 ==> 2	AMNH FARB 5117	n/a	n/a	n/a	n/a	n/a
12 (65)	92 (92. Parietal, rostrl mrgn, shp (PHYLO 162)), 1 0.200 0 ==> 1	TMP 1981.012.0001, UWBM 99000	n/a	n/a	n/a	n/a	n/a
12 (65)	916 (916. Frontal, po bttrss, lngth rltv to dtfo), 2 0.333 0 ==> 2	TMP 1981.012.0001, UWBM 99000	n/a	n/a	n/a	n/a	n/a
12 (65)	954 (954. Frontal, frntprtl str, ornttn), 1 0.250 0 ==> 1	TMP 1981.012.0001, UWBM 99000	n/a	n/a	n/a	n/a	n/a
12 (65)	970 (970. Parietal, nchl crst, pts mddrsl to soc), 1 0.500 1 ==> 2	TMP 1981.012.0001, UWBM 99000	n/a	n/a	n/a	n/a	n/a
12 (65)	980 (980. Parietal, nchl crst, drsl mscl scr, rstrl, extnt), 1 0.500 0 ==> 1	TMP 1981.012.0001, UWBM 99000	n/a	n/a	n/a	n/a	n/a
12 (65)	983 (983. Parietal, rstrltrl pr, bs, ventroltrl rdg), 1 0.667 0 ==> 1	TMP 1981.012.0001, UWBM 99000	n/a	n/a	n/a	n/a	n/a
12 (65)	1007 (1007. Otoccipital, nck of occ con, pit), 1 0.333 0 ==> 1	TMP 1981.012.0001, UWBM 99000	n/a	n/a	n/a	n/a	n/a
12 (65)	1048 (1048. Basisphenoid, spt, prsnc), 1 1.000 0 ==> 1	TMP 1981.012.0001, UWBM 99000	n/a	n/a	n/a	n/a	n/a
12 (65)	1052 (1052. Basisphenoid, flng frm vntrl end of prtc pndnt), 1 1.000 0 ==> 1	TMP 1981.012.0001, UWBM 99000	n/a	n/a	n/a	n/a	n/a
13 (64)	55 (55. Jugal, pstrbtl pr, dprssn, prsnc (PHYLO 97)), 1 0.500 1 ==> 2	RSM 2523.8, SDSM 12047	shallow to enhanced	1 (shallow to deep)	homologous	12	Daspletosaurus + (Zhuchengtyrannus + Tyrannosaurus)
13 (64)	120 (120. Dentary, vntrl br, rgn blw Mckln fssa, js, frm (PHYLO 232)), 1 0.333 0 ==> 1	RSM 2523.8, SDSM 12047	n/a	n/a	n/a	n/a	n/a
13 (64)	127 (127. Surangular, srnglr shlf, ltrl ornttn (PHYLO 241)), 1 0.500 0 ==> 1	RSM 2523.8, SDSM 12047	lateral to lateroventral	1 (low ridge to lateral), 2 (lateral to lateroventral)	nonhomologous, homologous	n/a, 11	Stokesosaurids' + derived tyrannosauroids, derived tyrannosaurines
13 (64)	133 (133. Dentary, nmbr of alvli (PHYLO 263)), 1 0.571 3 ==> 2	RSM 2523.8, SDSM 12047	n/a	n/a	n/a	n/a	n/a
13 (64)	360 (360. Maxilla, alvlr pr, vntrl mrgn, angltn), 1 0.500 1 ==> 2	RSM 2523.8, SDSM 12047	n/a	n/a	n/a	n/a	n/a
13 (64)	427 (427. Maxilla, vntrl jgl pr, frm, ltrl vw), 1 0.667 1 ==> 2	RSM 2523.8, SDSM 12047	n/a	n/a	n/a	n/a	n/a
13 (64)	464 (464. Lacrimal, rstrl rms, rstrdrsl mrgn), 1 0.667 1 ==> 2	RSM 2523.8, SDSM 12047	n/a	n/a	n/a	n/a	n/a
13 (64)	467 (467. Lacrimal, dstl rcss, expsr), 1 0.400 1 ==> 2	RSM 2523.8, SDSM 12047	n/a	n/a	n/a	n/a	n/a
13 (64)	525 (525. Lacrimal, vntrl rms, mdl srfc, slci, prsnc), 1 0.500 0 ==> 1	RSM 2523.8, SDSM 12047	n/a	n/a	n/a	n/a	n/a
13 (64)	546 (546. Jugal, mdl mxllry pr, rstrl end, dpth inst), 1 1.000 1 ==> 2	RSM 2523.8, SDSM 12047	n/a	n/a	n/a	n/a	n/a
13 (64)	590 (590. Jugal, vntrl qj pr, drsltrl srfc), 1 1.000 1 ==> 2	RSM 2523.8, SDSM 12047	n/a	n/a	n/a	n/a	n/a
13 (64)	677 (677. Squamosal, cdl pr, txtr) , 1 0.500 0 ==> 1	RSM 2523.8, SDSM 12047	n/a	n/a	n/a	n/a	n/a
13 (64)	683 (683. Squamosal, mdl pr, drsl bs, ntch), 1 0.500 0 ==> 1	RSM 2523.8, SDSM 12047	n/a	n/a	n/a	n/a	n/a
13 (64)	755 (755. Quadratojugal, vntrl qu pr, js qu, dorsal margin, orntn), 1 0.333 0 ==> 1	RSM 2523.8, SDSM 12047	n/a	n/a	n/a	n/a	n/a
13 (64)	761 (761. Quadrate, shft, cddrsmdl edg, frm), 1 0.333 0 ==> 1	RSM 2523.8, SDSM 12047	n/a	n/a	n/a	n/a	n/a
13 (64)	805 (805. Palatine, vmrptrygd rms, rstrl mrgn, pstn), 1 0.333 0 ==> 1	RSM 2523.8, SDSM 12047	n/a	n/a	n/a	n/a	n/a
13 (64)	865 (865. Ectopterygoid, cdl pr, js for pt, dpth), 1 0.333 0 ==> 1	RSM 2523.8, SDSM 12047	n/a	n/a	n/a	n/a	n/a
13 (64)	936 (936. Frontal, dtfo, rdg, prsnc), 1 0.250 0 ==> 1	RSM 2523.8, SDSM 12047	n/a	n/a	n/a	n/a	n/a
13 (64)	1051 (1051. Basisphenoid, ltrl mrgn, frm), 1 1.000 0 ==> 1	RSM 2523.8, SDSM 12047	n/a	n/a	n/a	n/a	n/a
13 (64)	1849 (1849. EFS, prsnc), 1 1.000 0 ==> 1	RSM 2523.8, SDSM 12047		n/a	n/a	n/a	n/a
14 (62)	330 (330. Maxilla, sbnrl frmn, dpth), 1 0.250 0 ==> 1	AMNH FARB 5027, AMNH FARB 5029	n/a	n/a	n/a	n/a	n/a
14 (62)	351 (351. Maxilla, ascndng rms, frm, ltrl vw), 1 0.400 1 ==> 2	AMNH FARB 5027, AMNH FARB 5029	n/a	n/a	n/a	n/a	n/a
14 (62)	378 (378. Maxilla, antrbtl fssa, ltrmdlly pntrtng frmna, prsnc) , 1 0.500 0 ==> 1	AMNH FARB 5027, AMNH FARB 5029	n/a	n/a	n/a	n/a	n/a
14 (62)	478 (478. Lacrimal, rstrdrsl pr, pstn of tp) , 1 0.333 0 ==> 1	AMNH FARB 5027, AMNH FARB 5029	n/a	n/a	n/a	n/a	n/a
14 (62)	569 (569. Jugal, pstrbtl pr, dprssn, pstn), 1 0.667 1 ==> 2	AMNH FARB 5027, AMNH FARB 5029	n/a	n/a	n/a	n/a	n/a
14 (62)	973 (973. Parietal, prtsoc pllr, prsnc), 1 0.400 1 ==> 2	AMNH FARB 5027, AMNH FARB 5029	n/a	n/a	n/a	n/a	n/a
14 (62)	1020 (1020. Basioccipital, glnfrm), 1 0.250 0 ==> 1	AMNH FARB 5027, AMNH FARB 5029	n/a	n/a	n/a	n/a	n/a
14 (62)	1100 (1100. Dentary, Mckln grv, dv pstn), 1 0.500 1 ==> 2	AMNH FARB 5027, AMNH FARB 5029	n/a	n/a	n/a	n/a	n/a
14 (62)	1123 (1123. Dentary, cdl plt, cdl mrgn, frm), 1 0.500 0 ==> 1	AMNH FARB 5027, AMNH FARB 5029	n/a	n/a	n/a	n/a	n/a
14 (62)	1613 (1613. Ischium, smcrclr scrs, nmbr), 1 1.000 0 ==> 1	AMNH FARB 5027, AMNH FARB 5029	n/a	n/a	n/a	n/a	n/a
15 (61)	1071 (1071. Dentary, cnvx mrgn, extnt), 1 0.250 1 ==> 0	NHMUK R7994	n/a	n/a	n/a	n/a	n/a
15 (61)	1223 (1223. Axis, axl intrcntrm, js, rtio hght to mdltrl wdth), 1 1.000 0 ==> 1	NHMUK R7994	n/a	n/a	n/a	n/a	n/a
15 (61)	1256 (1256. Axis, spns pr, drsltrl pr, dv hght), 1 1.000 0 ==> 1	NHMUK R7994	n/a	n/a	n/a	n/a	n/a
16 (60)	1095 (1095. Dentary, js for splnl, dstnctvnss), 1 0.500 1 ==> 2	NMMNH P-3968	n/a	n/a	n/a	n/a	n/a
17 (59)	618 (618. Postorbital, drsl mrgn, ornttn), 1 0.250 1 ==> 2	MOR 555, MOR 980, MOR 1131	n/a	n/a	n/a	n/a	n/a
17 (59)	1084 (1084. Dentary, intrdntl plts, ntchs), 1 0.667 1 ==> 0	MOR 555, MOR 980, MOR 1131	n/a	n/a	n/a	n/a	n/a
18 (58)	166 (166. Ilium, pbc pdncl, vntrl mrgn, ornttn (PHYLO 333)), 1 1.000 0 ==> 1	CM 9380, LACM 23844	n/a	n/a	n/a	n/a	n/a
18 (58)	671 (671. Squamosal, qj pr, vntrl mrgn, cncvty), 1 1.000 0 ==> 1	CM 9380, LACM 23844	n/a	n/a	n/a	n/a	n/a
18 (58)	694 (694. Squamosal, js for otccptl, frm), 1 1.000 0 ==> 1	CM 9380, LACM 23844	n/a	n/a	n/a	n/a	n/a
18 (58)	735 (735. Quadratojugal, jgl rms, vntrl mrgn, frm), 1 1.000 1 ==> 2	CM 9380, LACM 23844		n/a	n/a	n/a	n/a
18 (58)	747 (747. Quadratojugal, shft, pstn mdl edg), 1 0.500 1 ==> 0	CM 9380, LACM 23844	n/a	n/a	n/a	n/a	n/a
18 (58)	1686 (1686. Fibula, srfc dstl to bprtt scr, wdth) , 1 0.500 0 ==> 1	CM 9380, LACM 23844	n/a	n/a	n/a	n/a	n/a
19 (56)	71 (71. Postorbital, ostdrm, fsn (PHYLO 121)), 1 0.333 0 ==> 1	MOR 008, UCMP 118472, UMNH 11000	n/a	n/a	n/a	n/a	n/a
19 (56)	98 (98. Ectopterygoid, jgl pr, cdl srfc, prfrtn (PHYLO 175)), 1 0.500 1 ==> 0	MOR 008, UCMP 118472, UMNH 11000	n/a	n/a	n/a	n/a	n/a
19 (56)	147 (147. Crvcl vrt, cntrm, hypphyss, prsnc (PHYLO 280)), 1 1.000 0 ==> 1	MOR 008, UCMP 118472, UMNH 11000	absent to present	1 (absent to present)	homologous	4	Xiongguanlong + derived tyrannosauroids
19 (56)	378 (378. Maxilla, antrbtl fssa, ltrmdlly pntrtng frmna, prsnc), 1 0.500 1 ==> 0	MOR 008, UCMP 118472, UMNH 11000	n/a	n/a	n/a	n/a	n/a
19 (56)	396 (396. Maxilla, intrnl antrbtl fnstra, pnt rstrl incrsn, rltv to tth), 1 0.667 2 ==> 1	MOR 008, UCMP 118472, UMNH 11000	n/a	n/a	n/a	n/a	n/a
19 (56)	526 (526. Lacrimal, vntrl rms, rstrvntrl mrgn), 1 0.500 2 ==> 1	MOR 008, UCMP 118472, UMNH 11000	n/a	n/a	n/a	n/a	n/a
19 (56)	551 (551. Jugal, scndry fssa, rdge), 1 0.333 0 ==> 1	MOR 008, UCMP 118472, UMNH 11000	n/a	n/a	n/a	n/a	n/a
19 (56)	648 (648. Postorbital, jgl rms, dstl tp), 1 0.500 1 ==> 0	MOR 008, UCMP 118472, UMNH 11000	n/a	n/a	n/a	n/a	n/a
19 (56)	711 (711. Squamosal, vntrl po pr, rdg), 1 0.500 0 ==> 1	MOR 008, UCMP 118472, UMNH 11000	n/a	n/a	n/a	n/a	n/a
19 (56)	733 (733. Quadratojugal, jgl rms, drsl mrgn, pstn), 1 0.667 1 ==> 2	MOR 008, UCMP 118472, UMNH 11000	n/a	n/a	n/a	n/a	n/a
19 (56)	911 (911. Frontal, js for mdl frntl pr of nsl, cdl extnt) , 1 0.250 0 ==> 1	MOR 008, UCMP 118472, UMNH 11000	n/a	n/a	n/a	n/a	n/a
19 (56)	1116 (1116. Dentary, Mckln fssa, rstrl mrgn, pstn) , 1 0.500 1 ==> 0	MOR 008, UCMP 118472, UMNH 11000	n/a	n/a	n/a	n/a	n/a
19 (56)	1174 (1174. Prearticular, prrtclranglr bttrss, prsnc), 1 1.000 0 ==> 1	MOR 008, UCMP 118472, UMNH 11000	n/a	n/a	n/a	n/a	n/a
19 (56)	1667 (1667. Fibula, dstl end, dstnctn btwn shft & js), 1 0.667 1 ==> 2	MOR 008, UCMP 118472, UMNH 11000	n/a	n/a	n/a	n/a	n/a
19 (56)	1668 (1668. Fibula, dstl end, antrr mrgn, frm), 1 1.000 0 ==> 1	MOR 008, UCMP 118472, UMNH 11000	n/a	n/a	n/a	n/a	n/a
20 (55)	78 (78. Quadratojugal, shft, qu fssa, dpth (PHYLO 137)), 1 0.250 0 ==> 1	FMNH PR2081 (UGWM 181+MOR 2822)	n/a	n/a	n/a	n/a	n/a
20 (55)	499 (499. Lacrimal, srfc ahd of orbtnsl rdg & blw mdl pnmtc rcss), 1 0.500 0 ==> 1	FMNH PR2081 (UGWM 181+MOR 2822)	n/a	n/a	n/a	n/a	n/a
20 (55)	530 (530. Lacrimal, rstrvntrl ala, js pltn, pstn), 1 0.400 2 ==> 1	FMNH PR2081 (UGWM 181+MOR 2822)	n/a	n/a	n/a	n/a	n/a
20 (55)	952 (952. Frontal, nsl rms, frm), 1 0.667 1 ==> 2	FMNH PR2081 (UGWM 181+MOR 2822)	n/a	n/a	n/a	n/a	n/a
20 (55)	1027 (1027. Basioccipital, vntrl mrgn, flng), 1 0.500 1 ==> 0	FMNH PR2081 (UGWM 181+MOR 2822)	n/a	n/a	n/a	n/a	n/a
20 (55)	1039 (1039. Basioccipital, sbcndylr pn frmn, chnnl), 1 0.333 0 ==> 1	FMNH PR2081 (UGWM 181+MOR 2822)	n/a	n/a	n/a	n/a	n/a
20 (55)	1100 (1100. Dentary, Mckln grv, dv pstn), 1 0.500 2 ==> 1	FMNH PR2081 (UGWM 181+MOR 2822)	n/a	n/a	n/a	n/a	n/a
21 (FMNH PR2081)	20 (20. Maxilla, antrbtl fssa, rgn blw antrbtl fnstra, hght (PHYLO 35)), 1 0.429 3 ==> 2	FMNH PR2081	n/a	n/a	n/a	n/a	n/a
21 (FMNH PR2081)	406 (406. Maxilla, pltl pr, trgh, cdl-mst extnt), 1 0.667 1 ==> 2	FMNH PR2081	n/a	n/a	n/a	n/a	n/a
21 (FMNH PR2081)	431 (431. Lacrimal, drsl rms, txtr), 1 0.400 1 ==> 2	FMNH PR2081	n/a	n/a	n/a	n/a	n/a
21 (FMNH PR2081)	516 (516. Lacrimal, sbrbtl lgmnt scr, frm), 1 0.500 0 ==> 1	FMNH PR2081	n/a	n/a	n/a	n/a	n/a
21 (FMNH PR2081)	525 (525. Lacrimal, vntrl rms, mdl srfc, slci, prsnc), 1 0.500 1 ==> 0	FMNH PR2081	n/a	n/a	n/a	n/a	n/a
21 (FMNH PR2081)	530 (530. Lacrimal, rstrvntrl ala, js pltn, pstn), 1 0.400 1 ==> 0	FMNH PR2081	n/a	n/a	n/a	n/a	n/a
21 (FMNH PR2081)	602 (602. Postorbital, dtfo, crs btwn bttrss & shlf), 1 0.500 1 ==> 0	FMNH PR2081	n/a	n/a	n/a	n/a	n/a
21 (FMNH PR2081)	627 (627. Postorbital, crnl pr, dtfo intrrptn), 1 0.500 1 ==> 0	FMNH PR2081	n/a	n/a	n/a	n/a	n/a
21 (FMNH PR2081)	646 (646. Postorbital, orbt mrgn, frmn), 1 0.400 1 ==> 2	FMNH PR2081	n/a	n/a	n/a	n/a	n/a
21 (FMNH PR2081)	701 (701. Squamosal, qu ctyl, txtr) , 1 0.667 2 ==> 1	FMNH PR2081	n/a	n/a	n/a	n/a	n/a
21 (FMNH PR2081)	734 (734. Quadratojugal, jgl rms, fssa dpth), 1 0.500 0 ==> 1	FMNH PR2081	n/a	n/a	n/a	n/a	n/a
21 (FMNH PR2081)	903 (903. Frontal, orbtl ntch, frm, vntrl vw), 1 0.500 1 ==> 0	FMNH PR2081	n/a	n/a	n/a	n/a	n/a
21 (FMNH PR2081)	914 (914. Frontal, js for prf, dstnc from orbtl ntch), 1 0.250 1 ==> 0	FMNH PR2081	n/a	n/a	n/a	n/a	n/a
21 (FMNH PR2081)	956 (956. Frontal, rdg prlll to frntprtl cntct), 1 0.200 1 ==> 0	FMNH PR2081	n/a	n/a	n/a	n/a	n/a
21 (FMNH PR2081)	1037 (1037. Basioccipital, bstbrl web, vntrl mrgn, frmn, prnsc), 1 0.500 1 ==> 0	FMNH PR2081	n/a	n/a	n/a	n/a	n/a
21 (FMNH PR2081)	1219 (1219. Axis, axl intrcntrm, antrr js, frm), 1 0.600 2 ==> 3	FMNH PR2081	n/a	n/a	n/a	n/a	n/a
21 (FMNH PR2081)	1220 (1220. Axis, axl intrcntrm, antrr js, vntrl mrgn, sptrn), 1 1.000 1 ==> 2	FMNH PR2081	n/a	n/a	n/a	n/a	n/a
21 (FMNH PR2081)	1227 (1227. Axis, axl intrcntrm, shp, vntrl vw), 1 0.667 1 ==> 2	FMNH PR2081	n/a	n/a	n/a	n/a	n/a
21 (FMNH PR2081)	1230 (1230. Axis, axl intrcntrm, vntrl srfc, ltrl extnt) , 1 0.500 0 ==> 1	FMNH PR2081	n/a	n/a	n/a	n/a	n/a
