# Supplementary material for: A high-resolution growth series of Tyrannosaurus rex obtained from multiple lines of evidence
Source: PeerJ journal article supplement (doi:10.7717/peerj.9192), 2020-06-04
Supplement: Supplemental_Data_S5_KT.xlsx [file Supplemental_Data_S5_KT.xlsx]

## Sheet: Sheet1
Specimen	character	ornaments	progressions	reversals
DDM 344.1	902 (902. Frontal, orbt clng, frmna, prsnc) 1 0.333 0 ==> 1	n/a	1	0
DDM 344.1	927 (927. Frontal, sgttl frmn, pstn rltv to dtfo) 1 0.667 0 ==> 1	n/a	1	0
DDM 344.1	938 (938. Frontal, dtfo, rstrl rgn, frm) 1 0.250 0 ==> 1	n/a	1	0
CMNH 7541	92 (92. Parietal, rostrl mrgn, shp (PHYLO 162)) 1 0.200 0 ==> 1	n/a	1	0
CMNH 7541	326 (326. Maxilla, rstrdrsl mrgn) 1 1.000 0 ==> 1	n/a	1	0
CMNH 7541	963 (963. Parietal, sggtl crst, cdl end, extnt) 1 0.200 0 ==> 1	n/a	1	0
BMRP 2002.4.1	6 (6. Premaxilla, nsl pr, tp, appstn (PHYLO 11)) 1 0.500 0 ==> 1	n/a	1	0
BMRP 2002.4.1	320 (320. Nasal, cdl intnsl str, rstrl extnt, vntrl) 1 0.500 0 ==> 1	n/a	1	0
BMRP 2002.4.1	331 (331. Maxilla, trct of sbnrl frmn, nmbr frmna) 1 1.000 0 ==> 1	n/a	1	0
BMRP 2002.4.1	449 (449. Lacrimal, drsl rms, subctns srfc, hght rltv to js for nsl) 1 0.500 0 ==> 1	n/a	1	0
BMRP 2002.4.1	492 (492. Lacrimal, rstrvntrl lmna, rstrl mrgn, frm) 1 0.400 1 ==> 2	n/a	1	0
BMRP 2002.4.1	501 (501. Lacrimal, jnctn btwn aofo & vntrl rms) 1 0.667 0 ==> 1	n/a	1	0
BMRP 2002.4.1	533 (533. Lacrimal, vntrl rms, jgl str, angl) 1 0.250 0 ==> 1	n/a	1	0
BMRP 2002.4.1	583 (583. Jugal, js for qj, prxmty to crnl pr) 1 0.400 0 ==> 1	n/a	1	0
BMRP 2002.4.1	633 (633. Postorbital, ltf, spur) 1 0.250 0 ==> 1	n/a	1	0
BMRP 2002.4.1	834 (834. Palatine, flng alng bdy, prsnc) 1 1.000 0 ==> 1	n/a	1	0
BMRP 2002.4.1	863 (863. Ectopterygoid, cdl pr, ornttn) 1 1.000 0 ==> 1	n/a	1	0
BMRP 2002.4.1	1138 (1138. Surangular, rstrl glnd pr, ornttn) 1 0.500 0 ==> 1	n/a	1	0
BMRP 2002.4.1	1140 (1140. Surangular, cdl glnd pr, hght) 1 1.000 0 ==> 1	n/a	1	0
BMRP 2002.4.1	1141 (1141. Surangular, cdl glnd pr, apx) 1 1.000 0 ==> 1	n/a	1	0
BMRP 2002.4.1	1638 (1638. Tibia, pstrltrl srf, tbrcl, prsnc) 1 0.500 0 ==> 1	n/a	1	0
BMRP 2002.4.1	1733 (1733. MTT III, dstl cndyl, dstl mrgn, frm) 1 1.000 0 ==> 1	n/a	1	0
LACM 23845	911 (911. Frontal, js for mdl frntl pr of nsl, cdl extnt) 1 0.250 0 ==> 1	n/a	1	0
LACM 23845	942 (942. Frontal, frhd, rstrcdl ornttn) 1 0.286 1 ==> 2	n/a	1	0
LACM 23845	984 (984. Parietal, rstrl pr, edncrnl srfc, mdln dvt, prsnc) 1 1.000 0 ==> 1	n/a	1	0
LACM 23845	985 (985. Parietal, rstrl pr, rgn ahd of mdltrl rdg, frm) 1 1.000 0 ==> 1	n/a	1	0
LACM 23845	1166 (1166. Angular, cdl pr, cdvntrl fssa & rdg) 1 0.250 1 ==> 2	n/a	1	0
LACM 23845	1801 (1801. D IV, PH 2, shft, drsltrl srfc, frm) 1 0.500 0 ==> 1	n/a	1	0
MOR 1125	55 (55. Jugal, pstrbtl pr, dprssn, prsnc (PHYLO 97)) 1 0.500 1 ==> 2	n/a	1	0
MOR 1125	120 (120. Dentary, vntrl br, rgn blw Mckln fssa, js, frm (PHYLO 232)) 1 0.333 0 ==> 1	n/a	1	0
MOR 1125	127 (127. Surangular, srnglr shlf, ltrl ornttn (PHYLO 241)) 1 0.500 0 ==> 1	n/a	1	0
MOR 1125	330 (330. Maxilla, sbnrl frmn, dpth) 1 0.250 0 ==> 1	n/a	1	0
MOR 1125	360 (360. Maxilla, alvlr pr, vntrl mrgn, angltn) 1 0.500 1 ==> 2	n/a	1	0
MOR 1125	414 (414. Maxilla, pltl pr, dstnc frm drsl jgl pr) 1 0.500 0 ==> 1	n/a	1	0
MOR 1125	419 (419. Maxilla, js for jgl, rstrl extnt) 1 0.333 0 ==> 1	n/a	1	0
MOR 1125	431 (431. Lacrimal, drsl rms, txtr) 1 0.400 0 ==> 1	ornament	1	0
MOR 1125	449 (449. Lacrimal, drsl rms, subctns srfc, hght rltv to js for nsl) 1 0.500 0 ==> 1	n/a	1	0
MOR 1125	459 (459. Lacrimal, sptm rstrl to lpr, infltn) 1 0.667 1 ==> 2	n/a	1	0
MOR 1125	464 (464. Lacrimal, rstrl rms, rstrdrsl mrgn) 1 0.667 1 ==> 2	n/a	1	0
MOR 1125	478 (478. Lacrimal, rstrdrsl pr, pstn of tp) 1 0.333 0 ==> 1	n/a	1	0
MOR 1125	512 (512. Lacrimal, gp btwn vtrl rms & rstrvntrl lmna) 1 0.500 0 ==> 1	n/a	1	0
MOR 1125	611 (611. Postorbital, js for po bttrss, mdl hlf) 1 0.500 0 ==> 1	n/a	1	0
MOR 1125	617 (617. Postorbital, js ltrsphnd, drctn) 1 0.500 0 ==> 1	n/a	1	0
MOR 1125	618 (618. Postorbital, drsl mrgn, ornttn) 1 0.250 1 ==> 2	n/a	1	0
MOR 1125	673 (673. Squamosal, qj pr, vntrl grv, prsnc) 1 0.250 0 ==> 1	n/a	1	0
MOR 1125	683 (683. Squamosal, mdl pr, drsl bs, ntch) 1 0.500 0 ==> 1	n/a	1	0
MOR 1125	704 (704. Squamosal, dtfen, mdl ntch) 1 0.333 0 ==> 1	n/a	1	0
MOR 1125	728 (728. Quadratojugal, sq pr, rstrl srfc, ltrl rdg) 1 0.286 1 ==> 2	n/a	1	0
MOR 1125	755 (755. Quadratojugal, vntrl qu pr, js qu, dorsal margin, orntn) 1 0.333 0 ==> 1	n/a	1	0
MOR 1125	761 (761. Quadrate, shft, cddrsmdl edg, frm) 1 0.333 0 ==> 1	n/a	1	0
MOR 1125	766 (766. Quadrate, vntrl qj pr, drsltrl crnr, pr) 1 1.000 0 ==> 1	n/a	1	0
MOR 1125	805 (805. Palatine, vmrptrygd rms, rstrl mrgn, pstn) 1 0.333 0 ==> 1	n/a	1	0
MOR 1125	812 (812. Palatine, drsltrl pr, sbrdnt prs, ornttn) 1 1.000 0 ==> 1	n/a	1	0
MOR 1125	817 (817. Palatine, rstrl pn rcss, brch) 1 0.500 0 ==> 1	n/a	1	0
MOR 1125	828 (828. Palatine, accssry pn frmna, prsnc) 1 0.500 0 ==> 1	n/a	1	0
MOR 1125	847 (847. Ectopterygoid, jgl pr, rdg mdl to jgl flng) 1 0.333 0 ==> 1	n/a	1	0
MOR 1125	862 (862. Ectopterygoid, cdl pr, tp) 1 0.500 0 ==> 1	n/a	1	0
MOR 1125	865 (865. Ectopterygoid, cdl pr, js for pt, dpth) 1 0.333 0 ==> 1	n/a	1	0
MOR 1125	963 (963. Parietal, sggtl crst, cdl end, extnt) 1 0.200 0 ==> 1	n/a	1	0
MOR 1125	970 (970. Parietal, nchl crst, pts mddrsl to soc) 1 0.500 1 ==> 2	n/a	1	0
MOR 1125	973 (973. Parietal, prtsoc pllr, prsnc) 1 0.400 1 ==> 2	n/a	1	0
MOR 1125	980 (980. Parietal, nchl crst, drsl mscl scr, rstrl, extnt) 1 0.500 0 ==> 1	n/a	1	0
MOR 1125	1022 (1022. Basioccipital, occ con, cdl mrgn, frm) 1 0.500 0 ==> 1	n/a	1	0
MOR 1125	1059 (1059. Laterosphenoidoorbitosphenoid suture, clsr) 1 0.500 0 ==> 1	n/a	1	0
MOR 1125	1084 (1084. Dentary, intrdntl plts, ntchs) 1 0.667 1 ==> 2	n/a	1	0
MOR 1125	1157 (1157. Surangular, js for anglr, frm) 1 1.000 0 ==> 1	n/a	1	0
MOR 1125	1159 (1159. Surangular, vntrl mrgn, frm) 1 0.500 0 ==> 1	n/a	1	0
MOR 1125	1164 (1164. Surangular, intrmndblr pr, ornttn, drsl vw) 1 0.500 1 ==> 2	n/a	1	0
MOR 1125	1557 (1557. Scapula, shft, rgn of mxmm crvtr) 1 0.333 0 ==> 1	n/a	1	0
MOR 1125	1619 (1619. Femur, circ to lngth rtio) 1 0.500 0 ==> 1	n/a	1	0
MOR 1125	1621 (1621. Femur, acssry trchntr, dstnctvnss) 1 0.500 0 ==> 1	n/a	1	0
MOR 1125	1635 (1635. Tibia, shft, jnctn shft & mdl mllls) 1 0.500 1 ==> 0	n/a	0	1
MOR 1125	1648 (1648. Fibula, ovrll frm) 1 0.400 1 ==> 2	n/a	1	0
MOR 1125	1676 (1676. Fibula, mdl js for tbia abv mdl fssa, txtr) 1 0.500 0 ==> 1	n/a	1	0
MOR 1125	1686 (1686. Fibula, srfc dstl to bprtt scr, wdth) 1 0.500 0 ==> 1	n/a	1	0
MOR 1125	1832 (1832. Pedal unguals, drsm, frmna, prsnc) 1 0.500 0 ==> 1	n/a	1	0
TMP 1981.006.0001	92 (92. Parietal, rostrl mrgn, shp (PHYLO 162)) 1 0.200 0 ==> 1	n/a	1	0
TMP 1981.006.0001	324 (324. Nasal, mdl fr pr, sz) 1 1.000 0 ==> 1	n/a	1	0
TMP 1981.006.0001	351 (351. Maxilla, ascndng rms, frm, ltrl vw) 1 0.400 1 ==> 2	n/a	1	0
TMP 1981.006.0001	467 (467. Lacrimal, dstl rcss, expsr) 1 0.400 1 ==> 2	n/a	1	0
TMP 1981.006.0001	951 (951. Frontal, ltrl edge, ornttn) 1 0.200 1 ==> 0	n/a	0	1
TMP 1981.006.0001	1007 (1007. Otoccipital, nck of occ con, pit) 2 0.333 0 ==> 2	n/a	1	0
LACM 150167	42 (42. Lacrimal, lpr, sz (PHYLO 76)) 1 0.333 0 ==> 1	n/a	1	0
LACM 150167	90 (90. Frontal, orbtl ntch, frm, ltrl vw (PHYLO 160)) 1 0.400 1 ==> 2	n/a	1	0
LACM 150167	119 (119. Dentary, symphysis, rstrl mrgn (PHYLO 231)) 1 0.500 1 ==> 0	n/a	0	1
LACM 150167	128 (128. Surangular, srnglr shlf, rstrcdl ornttn (PHYLO 242)) 1 0.500 1 ==> 0	n/a	0	1
LACM 150167	207 (207. Dentary, first two alvli, cmbnd lngths (PHYLO C12 121)) 1 0.500 1 ==> 0	n/a	0	1
LACM 150167	247 (247. Foramen magnum, size) 1 0.500 1 ==> 0	n/a	0	1
LACM 150167	260 (260. Premaxilla, nsl pr, ornttn) 1 0.500 1 ==> 0	n/a	0	1
LACM 150167	263 (263. Premaxilla, nsl pr, V-shpd, frmn, rc pstn) 1 0.500 0 ==> 1	n/a	1	0
LACM 150167	275 (275. Premaxilla, alvlr. skrts, prsnc) 1 0.333 1 ==> 0	n/a	0	1
LACM 150167	330 (330. Maxilla, sbnrl frmn, dpth) 1 0.250 0 ==> 1	n/a	1	0
LACM 150167	351 (351. Maxilla, ascndng rms, frm, ltrl vw) 1 0.400 1 ==> 0	n/a	0	1
LACM 150167	353 (353. Maxilla, js for lcrml, dpth, mdl vw) 1 1.000 1 ==> 2	n/a	1	0
LACM 150167	478 (478. Lacrimal, rstrdrsl pr, pstn of tp) 1 0.333 0 ==> 1	n/a	1	0
LACM 150167	501 (501. Lacrimal, jnctn btwn aofo & vntrl rms) 1 0.667 0 ==> 2	n/a	1	0
LACM 150167	586 (586. Jugal, vntrl qj pr, ltrl rdg, sz) 1 0.500 0 ==> 1	n/a	1	0
LACM 150167	587 (587. Jugal, vntrl qj pr, drsl hlf js) 1 0.500 0 ==> 1	n/a	1	0
LACM 150167	589 (589. Jugal, vntrl qj pr, mdl cncvty) 1 0.400 1 ==> 2	n/a	1	0
LACM 150167	595 (595. Jugal, vntrl qj pr, mdrgn) 1 0.500 0 ==> 1	n/a	1	0
LACM 150167	618 (618. Postorbital, drsl mrgn, ornttn) 1 0.250 1 ==> 2	n/a	1	0
LACM 150167	623 (623. Postorbital, bdy, drsl mrgn, frm, rstrl vw) 1 0.500 1 ==> 0	n/a	0	1
LACM 150167	649 (649. Postorbital, jgl rms, mrgns) 1 0.500 1 ==> 0	n/a	0	1
LACM 150167	726 (726. Quadratojugal, js for sq, txtr) 1 0.500 1 ==> 0	n/a	0	1
LACM 150167	892 (892. Frontal, crnl crst, jnctn wth arwy) 1 0.667 1 ==> 2	n/a	1	0
LACM 150167	900 (900. Frontal, js for orbtsphnd, frm) 1 0.667 1 ==> 2	n/a	1	0
LACM 150167	911 (911. Frontal, js for mdl frntl pr of nsl, cdl extnt) 1 0.250 0 ==> 1	n/a	1	0
LACM 150167	912 (912. Frontal, prfntnsl pr, psnc) 1 0.250 1 ==> 0	n/a	0	1
LACM 150167	921 (921. Frontal, vntrl flng, vntrl mrgn, frm & ornttn) 1 0.500 0 ==> 1	n/a	1	0
LACM 150167	942 (942. Frontal, frhd, rstrcdl ornttn) 1 0.286 1 ==> 2	n/a	1	0
LACM 150167	952 (952. Frontal, nsl rms, frm) 1 0.667 1 ==> 2	n/a	1	0
LACM 150167	953 (953. Frontal, rgn btwn js for prfs, frm) 1 1.000 1 ==> 2	n/a	1	0
LACM 150167	981 (981. Parietal, nchl crst, drsltrl srfc, frm) 1 0.333 1 ==> 0	n/a	0	1
LACM 150167	1123 (1123. Dentary, cdl plt, cdl mrgn, frm) 1 0.500 0 ==> 1	n/a	1	0
LACM 150167	1165 (1165. Angular, emf, mrgn, txtr) 1 0.500 1 ==> 0	n/a	0	1
LACM 150167	1564 (1564. Scapula, shft, wst btwn acrmn & flt rgn of shft, dstnctvnss) 1 0.500 1 ==> 0	n/a	0	1
LACM 150167	1565 (1565. Scapula, shft, rdg on ltrl srfc of prxml end of expnded rgn, prsnc) 1 0.500 1 ==> 0	n/a	0	1
LACM 150167	1601 (1601. Ilium, cppdcs fssa, orgn ilfmrls intrns, extnt) 1 0.500 0 ==> 1	n/a	1	0
LACM 150167	1610 (1610. Ischium, dffnttn btwn ilc pdncl & pstrr mrgn) 1 0.500 0 ==> 1	n/a	1	0
LACM 150167	1612 (1612. Ischium, angltn btwn pstrr mrgn of bdy & pstrr shft) 1 0.333 0 ==> 1	n/a	1	0
LACM 150167	1648 (1648. Fibula, ovrll frm) 1 0.400 1 ==> 0	n/a	0	1
LACM 150167	1666 (1666. Fibula, dstl end, cndlyr srfc for clcnm, frm) 1 0.500 0 ==> 1	n/a	1	0
LACM 150167	1674 (1674. Fibula, mdl fssa, drsl mrgn, ornttn) 1 0.500 1 ==> 0	n/a	0	1
LACM 150167	1736 (1736. MTT III, pltfrm, grv, dpth) 1 1.000 1 ==> 2	n/a	1	0
AMNH FARB 5117	603 (603. Postorbital, dtfo, rdg, hght) 1 0.500 1 ==> 0	n/a	0	1
AMNH FARB 5117	612 (612. Postorbital, po bttrss, vntrl mrgn) 1 0.500 1 ==> 0	n/a	0	1
AMNH FARB 5117	614 (614. Postorbital, ltrsphnd pr, lngth) 1 1.000 0 ==> 1	n/a	1	0
AMNH FARB 5117	618 (618. Postorbital, drsl mrgn, ornttn) 1 0.250 1 ==> 0	n/a	0	1
AMNH FARB 5117	644 (644. Postorbital, orbt, cdl wll, frm) 1 0.500 1 ==> 0	n/a	0	1
AMNH FARB 5117	652 (652. Postorbital, js for jgl, mdl) 1 0.333 1 ==> 0	n/a	0	1
AMNH FARB 5117	654 (654. Postorbital, js for jgl, txtr) 1 0.333 1 ==> 0	n/a	0	1
AMNH FARB 5117	886 (886. Frontal, nsl rms, js fr msthmd, frm) 1 0.500 2 ==> 1	n/a	0	1
AMNH FARB 5117	937 (937. Frontal, dtfo, rstrl extnt) 1 0.400 1 ==> 0	n/a	0	1
AMNH FARB 5117	971 (971. Parietal, frntprtl jnctn at sgttl crst, wdth) 1 0.500 1 ==> 0	n/a	0	1
AMNH FARB 5117	972 (972. Parietal, rstrltrl pr, expsr) 1 0.222 1 ==> 0	n/a	0	1
AMNH FARB 5117	973 (973. Parietal, prtsoc pllr, prsnc) 1 0.400 1 ==> 2	n/a	1	0
AMNH FARB 5117	974 (974. Parietal, nchl crst, mdln strt) 1 0.500 1 ==> 0	n/a	0	1
AMNH FARB 5117	994 (994. Laterosphenoid, orbtl srfc, frm) 1 1.000 0 ==> 1	n/a	1	0
AMNH FARB 5117	1022 (1022. Basioccipital, occ con, cdl mrgn, frm) 1 0.500 0 ==> 1	n/a	1	0
AMNH FARB 5117	1024 (1024. Basioccipital, asndng scrs, prmnnc) 1 0.250 1 ==> 0	n/a	0	1
AMNH FARB 5117	1039 (1039. Basioccipital, sbcndylr pn frmn, chnnl) 1 0.333 0 ==> 1	n/a	1	0
UWBM 99000	625 (625. Postorbital, mdl fssa, drsl mrgn) 1 0.500 1 ==> 0	n/a	0	1
UWBM 99000	652 (652. Postorbital, js for jgl, mdl) 1 0.333 1 ==> 0	n/a	0	1
SDSM 12047	26 (26. Maxilla, crcmfssa rdg, prsnc (PHYLO 45)) 1 0.333 1 ==> 0	ornament	0	1
SDSM 12047	121 (121. Dentary, msl alvli, sz (PHYLO 233)) 1 0.500 1 ==> 0	n/a	0	1
SDSM 12047	356 (356. Maxilla, intrfnstrl strt, drsl end, frm) 1 0.667 1 ==> 0	n/a	0	1
SDSM 12047	692 (692. Squamosal, fssa, drsl mrgn) 1 0.200 1 ==> 0	n/a	0	1
SDSM 12047	716 (716. Squamosal, drsl po pr, dpth & angl) 1 0.250 1 ==> 0	n/a	0	1
RSM 2523.8	20 (20. Maxilla, antrbtl fssa, rgn blw antrbtl fnstra, hght (PHYLO 35)) 1 0.429 3 ==> 2	n/a	0	1
RSM 2523.8	132 (132. Maxilla, nmbr of tth (PHYLO 261)) 1 0.600 2 ==> 3	n/a	1	0
RSM 2523.8	335 (335. Maxilla, nrl fssa, extnt) 1 0.250 1 ==> 0	n/a	0	1
RSM 2523.8	431 (431. Lacrimal, drsl rms, txtr) 1 0.400 1 ==> 2	ornament	1	0
RSM 2523.8	528 (528. Lacrimal, vntrl rms, ltrl slcs) 1 0.250 1 ==> 0	n/a	0	1
RSM 2523.8	583 (583. Jugal, js for qj, prxmty to crnl pr) 1 0.400 2 ==> 1	n/a	0	1
RSM 2523.8	708 (708. Squamosal, po pr, flnge) 1 0.500 1 ==> 0	n/a	0	1
RSM 2523.8	739 (739. Quadratojugal, rstrl rdg, prx end) 1 0.333 1 ==> 0	n/a	0	1
RSM 2523.8	739 (739. Quadratojugal, rstrl rdg, prx end) 1 0.333 1 ==> 0	n/a	0	1
RSM 2523.8	1024 (1024. Basioccipital, asndng scrs, prmnnc) 1 0.250 1 ==> 0	n/a	0	1
AMNH FARB 5027	936 (936. Frontal, dtfo, rdg, prsnc) 1 0.250 1 ==> 0	n/a	0	1
AMNH FARB 5027	969 (969. Parietal, frntl cntct, frm) 1 0.250 1 ==> 0	n/a	0	1
AMNH FARB 5027	972 (972. Parietal, rstrltrl pr, expsr) 1 0.222 1 ==> 2	n/a	1	0
AMNH FARB 5027	1007 (1007. Otoccipital, nck of occ con, pit) 1 0.333 1 ==> 2	n/a	1	0
AMNH FARB 5027	1008 (1008. Otoccipital, prccptl pr, ornttn) 1 0.500 1 ==> 0	n/a	0	1
AMNH FARB 5027	1024 (1024. Basioccipital, asndng scrs, prmnnc) 1 0.250 1 ==> 0	n/a	0	1
AMNH FARB 5027	1029 (1029. Basioccipital, vntrl srfc btwn tbr, frm) 1 0.333 1 ==> 0	n/a	0	1
AMNH FARB 5027	1030 (1030. Basioccipital, occ con, nck, frm) 1 0.600 2 ==> 3	n/a	1	0
AMNH FARB 5027	1031 (1031. Basioccipital, vntrl lppt, prsnc) 1 0.500 1 ==> 0	n/a	0	1
AMNH FARB 5027	1145 (1145. Surangular, rgn blw glnd, mscl scr, prsnc) 1 0.250 1 ==> 0	n/a	0	1
AMNH FARB 5029	954 (954. Frontal, frntprtl str, ornttn) 1 0.250 1 ==> 0	n/a	0	1
AMNH FARB 5029	967 (967. Parietal, sgttl crst, lwst pnt) 1 0.333 1 ==> 0	n/a	0	1
AMNH FARB 5029	972 (972. Parietal, rstrltrl pr, expsr) 1 0.222 1 ==> 0	n/a	0	1
AMNH FARB 5029	978 (978. Parietal, nchl crst, cncvty, drsl extnt) 1 0.333 1 ==> 0	n/a	0	1
AMNH FARB 5029	1023 (1023. Basioccipital, occ con, dmpl, dpth) 1 0.200 0 ==> 1	n/a	1	0
NHMUK R7994	1064 (1064. Dentary, ratio rostral:caudal dpths) 1 1.000 0 ==> 1	n/a	1	0
NHMUK R7994	1080 (1080. Dentary, symphyss, cdl extnt) 1 0.200 1 ==> 0	n/a	0	1
NHMUK R7994	1230 (1230. Axis, axl intrcntrm, vntrl srfc, ltrl extnt) 1 0.500 0 ==> 1	n/a	1	0
NMMNH P-3698	65 (65. Postorbital, crnl pr, hght (PHYLO 111)) 1 0.500 1 ==> 0	ornament	0	1
NMMNH P-3698	620 (620. Postorbital, bdy, drsl mrgn, mdl vw) 1 0.400 2 ==> 1	n/a	0	1
NMMNH P-3698	662 (662. Squamosal, qj pr, dstl end, txtr) 1 0.333 1 ==> 0	n/a	0	1
NMMNH P-3698	1083 (1083. Dentary, intrdntl pts, spcng) 1 0.667 2 ==> 1	n/a	0	1
MOR 1131	88 (88. Frontal, rtio sggtl crst to bn lngth (PHYLO 158)) 1 0.500 1 ==> 0	n/a	0	1
MOR 1131	886 (886. Frontal, nsl rms, js fr msthmd, frm) 1 0.500 2 ==> 1	n/a	0	1
MOR 1131	920 (920. Frontal, po bttrss, sbrdnt prts, rltv sz) 1 0.400 1 ==> 2	n/a	1	0
MOR 1131	925 (925. Frontal, cdl shlf, frk, clft, dpth, drsl vw) 1 0.500 1 ==> 0	n/a	0	1
MOR 1131	926 (926. Frontal, sgttl frmn, pstn rltv to js for po) 1 0.333 1 ==> 0	n/a	0	1
MOR 1131	938 (938. Frontal, dtfo, rstrl rgn, frm) 1 0.250 1 ==> 0	n/a	0	1
MOR 1131	954 (954. Frontal, frntprtl str, ornttn) 1 0.250 1 ==> 0	n/a	0	1
MOR 1131	969 (969. Parietal, frntl cntct, frm) 1 0.250 1 ==> 0	n/a	0	1
MOR 1131	970 (970. Parietal, nchl crst, pts mddrsl to soc) 1 0.500 2 ==> 1	n/a	0	1
MOR 1131	996 (996. Laterosphenoid, po pr, prxml rgn, blk) 1 0.333 0 ==> 1	n/a	0	1
MOR 1131	997 (997. Laterosphenoid, frmn of js eptptrygd, pstn) 1 1.000 0 ==> 1	n/a	0	1
MOR 1131	1001 (1001. Laterosphenoidoparietal str, frm) 1 0.667 1 ==> 2	n/a	1	0
MOR 1131	1030 (1030. Basioccipital, occ con, nck, frm) 1 0.600 2 ==> 1	n/a	0	1
MOR 1131	1039 (1039. Basioccipital, sbcndylr pn frmn, chnnl) 1 0.333 0 ==> 1	n/a	0	1
MOR 1131	1058 (1058. Laterosphenoidoprootic suture, clsr) 1 1.000 1 ==> 2	n/a	1	0
MOR 980	15 (15. Maxilla, mxllry fnstra, dv pstn (PHYLO 23)) 1 0.333 0 ==> 1	n/a	1	0
MOR 980	20 (20. Maxilla, antrbtl fssa, rgn blw antrbtl fnstra, hght (PHYLO 35)) 1 0.429 3 ==> 2	n/a	0	1
MOR 980	36 (36. Nasal, nrl rgn, fssa, prsnc (PHYLO 62)) 1 0.333 1 ==> 0	n/a	0	1
MOR 980	68 (68. Postorbital, frntl pr, lngth (PHYLO 118, 119)) 1 0.500 1 ==> 0	n/a	0	1
MOR 980	69 (69. Postorbital, frntl pr, hght (PHYLO 118, 119)) 1 0.500 1 ==> 0	n/a	0	1
MOR 980	132 (132. Maxilla, nmbr of tth (PHYLO 261)) 1 0.600 2 ==> 3	n/a	1	0
MOR 980	218 (218. Snout, dffrnttn) 1 0.333 1 ==> 0	n/a	0	1
MOR 980	224 (224. External antorbital fenestra, vntrl mrgn) 1 0.500 2 ==> 1	n/a	0	1
MOR 980	302 (302. Nasal, prmx pr, orttn) 1 0.500 1 ==> 0	n/a	0	1
MOR 980	359 (359. Maxilla, alvlr pr, alvlr skrts, prsnc) 1 0.333 0 ==> 1	n/a	1	0
MOR 980	360 (360. Maxilla, alvlr pr, vntrl mrgn, angltn) 1 0.500 2 ==> 1	n/a	0	1
MOR 980	365 (365. Maxilla, prmxllry sns, cdl extnt) 1 0.500 1 ==> 0	n/a	0	1
MOR 980	377 (377. Maxilla, antrbtl fssa, accssry rcsss, prsnc) 1 0.333 0 ==> 1	n/a	1	0
MOR 980	403 (403. Maxilla, intrdntl plts, gps btwn bses, prsnc) 1 0.250 0 ==> 1	n/a	1	0
MOR 980	410 (410. Maxilla, js for pltn, mdltrl depth) 1 0.667 1 ==> 2	n/a	1	0
MOR 980	473 (473. Lacrimal, rstrl rms, cvrg by cdltrl pr of nsl) 1 0.500 1 ==> 0	n/a	0	1
MOR 980	480 (480. Lacrimal, rstrvntrl pr, lngth) 1 0.400 2 ==> 1	n/a	0	1
MOR 980	545 (545. Jugal, mxllry rms, js mxlla, ornttn) 1 0.500 1 ==> 0	n/a	0	1
MOR 980	548 (548. Jugal, pnmtc rcss, drsvntrl hght) 1 0.500 0 ==> 1	n/a	1	0
MOR 980	553 (553. Jugal, pnmtc rcss, aofo cdl to rcss) 1 0.500 0 ==> 1	n/a	1	0
MOR 980	560 (560. Jugal, mdl srfc, frmna number) 1 0.500 1 ==> 0	n/a	0	1
MOR 980	573 (573. Jugal, js for pstrbtl, frm) 1 0.500 1 ==> 0	n/a	0	1
MOR 980	584 (584. Jugal, js for qj, txtr) 1 0.500 1 ==> 0	n/a	0	1
MOR 980	594 (594. Jugal, vntrl qj pr, js, prxml frm) 1 0.333 1 ==> 0	n/a	0	1
MOR 980	633 (633. Postorbital, ltf, spur) 1 0.250 0 ==> 1	n/a	1	0
MOR 980	634 (634. Postorbital, sqmsl pr, dpth) 1 0.500 1 ==> 0	n/a	0	1
MOR 980	663 (663. Squamosal, qj pr, prxml end, ornttn) 1 0.500 1 ==> 0	n/a	0	1
MOR 980	677 (677. Squamosal, cdl pr, txtr) 1 0.500 1 ==> 0	n/a	0	1
MOR 980	709 (709. Squamosal, ps pr, flng, vntrl vw) 1 0.500 1 ==> 0	n/a	0	1
MOR 980	712 (712. Squamosal, ltrl rdg, wdth) 1 0.500 1 ==> 0	n/a	0	1
MOR 980	738 (738. Quadratojugal, ltrl rdge, cdvntrl end) 1 0.250 1 ==> 0	n/a	0	1
MOR 980	748 (748. Quadratojugal, shft, wst, rstrcdl lngth) 1 0.333 1 ==> 0	n/a	0	1
MOR 980	781 (781. Quadrate, mdl mndblr cndyl, cdl extnt) 1 0.333 1 ==> 0	n/a	0	1
MOR 980	914 (914. Frontal, js for prf, dstnc from orbtl ntch) 1 0.250 1 ==> 0	n/a	0	1
MOR 980	916 (916. Frontal, po bttrss, lngth rltv to dtfo) 1 0.333 2 ==> 1	n/a	0	1
MOR 980	983 (983. Parietal, rstrltrl pr, bs, ventroltrl rdg) 1 0.667 1 ==> 0	n/a	0	1
MOR 980	1001 (1001. Laterosphenoidoparietal str, frm) 1 0.667 1 ==> 0	n/a	0	1
MOR 980	1021 (1021. Basioccipital, occ con, cdvntrl srfc, frm) 1 0.500 1 ==> 0	n/a	0	1
MOR 980	1041 (1041. Basisphenoid, bsptrygd pr, cdl flng) 1 1.000 0 ==> 1	n/a	0	1
MOR 980	1072 (1072. Dentary, ltrl srfc, wdth) 1 0.500 2 ==> 1	n/a	0	1
MOR 980	1612 (1612. Ischium, angltn btwn pstrr mrgn of bdy & pstrr shft) 1 0.333 0 ==> 1	n/a	0	1
MOR 555	113 (113. Basisphenoid, rcss, clsr (PHYLO 209)) 1 0.500 1 ==> 0	n/a	0	1
MOR 555	120 (120. Dentary, vntrl br, rgn blw Mckln fssa, js, frm (PHYLO 232)) 1 0.333 1 ==> 0	n/a	0	1
MOR 555	124 (124. Dentary, chin, angle (PHYLO 237)) 1 0.333 1 ==> 0	n/a	0	1
MOR 555	133 (133. Dentary, nmbr of alvli (PHYLO 263)) 1 0.571 3 ==> 4	n/a	1	0
MOR 555	224 (224. External antorbital fenestra, vntrl mrgn) 1 0.500 2 ==> 3	n/a	1	0
MOR 555	311 (311. Nasal, cdltrl pr, lngth) 1 0.500 1 ==> 0	n/a	0	1
MOR 555	317 (317. Nasal, fr rms, mdln sptm, depth) 1 0.500 1 ==> 0	n/a	0	1
MOR 555	332 (332. Maxilla, trct of sbnrl frmn, rstrdrsl frmn, prsnc) 1 0.333 1 ==> 0	n/a	0	1
MOR 555	333 (333. Maxilla, trct of sbnrl frmn, rstrvntrl frmn, prsnc) 1 0.333 1 ==> 0	n/a	0	1
MOR 555	351 (351. Maxilla, ascndng rms, frm, ltrl vw) 1 0.400 2 ==> 1	n/a	0	1
MOR 555	375 (375. Maxilla, aofo, pstn rgn grtst inst dpth) 1 0.500 1 ==> 2	n/a	1	0
MOR 555	419 (419. Maxilla, js for jgl, rstrl extnt) 1 0.333 0 ==> 1	n/a	1	0
MOR 555	424 (424. Maxilla, jgl rms, wdth, vntrl vw) 1 0.333 1 ==> 0	n/a	0	1
MOR 555	427 (427. Maxilla, vntrl jgl pr, frm, ltrl vw) 1 0.667 2 ==> 1	n/a	0	1
MOR 555	440 (440. Lacrimal,drsl rms, prfntnsl js abv cnchl srfc) 1 0.500 2 ==> 1	n/a	0	1
MOR 555	475 (475. Lacrimal, js cdl to mdl tb, frm) 1 0.500 1 ==> 0	n/a	0	1
MOR 555	492 (492. Lacrimal, rstrvntrl lmna, rstrl mrgn, frm) 1 0.400 1 ==> 0	n/a	0	1
MOR 555	506 (506. Lacrimal, orbtnsl rdg, drsl frmn, shp) 1 0.333 1 ==> 0	n/a	0	1
MOR 555	522 (522. Lacrimal, vntrl rms, rstrdorsal mrgn, frm) 1 0.200 1 ==> 0	n/a	0	1
MOR 555	532 (532. Lacrimal, rstrventrl ala, mdl emrgntn, hght) 1 0.500 1 ==> 0	n/a	0	1
MOR 555	543 (543. Jugal, mxllry rms, js lcrml, cdl edg mdl) 1 0.500 1 ==> 0	n/a	0	1
MOR 555	574 (574. Jugal, js for pstrbtl, wdth) 1 0.500 1 ==> 0	n/a	0	1
MOR 555	585 (585. Jugal, vntrl qj pr, drsl hlf wdth) 1 1.000 0 ==> 1	n/a	1	0
MOR 555	586 (586. Jugal, vntrl qj pr, ltrl rdg, sz) 1 0.500 0 ==> 1	n/a	1	0
MOR 555	587 (587. Jugal, vntrl qj pr, drsl hlf js) 1 0.500 0 ==> 1	n/a	1	0
MOR 555	613 (613. Postorbital, clft btwn fr & ltrsphnd prs) 1 0.667 1 ==> 2	n/a	1	0
MOR 555	647 (647. Postorbital, jgl rms, mrgn blw ltrsphnd pr) 1 0.500 0 ==> 1	n/a	1	0
MOR 555	711 (711. Squamosal, vntrl po pr, rdg) 1 0.500 0 ==> 1	n/a	1	0
MOR 555	719 (719. Quadratojugal, sq pr, rstrl mrgn, clft) 1 0.333 2 ==> 1	n/a	0	1
MOR 555	728 (728. Quadratojugal, sq pr, rstrl srfc, ltrl rdg) 1 0.286 1 ==> 2	n/a	1	0
MOR 555	729 (729. Quadratojugal, sq pr, rstrdrsl mrgn, ornttn) 1 0.500 1 ==> 0	n/a	0	1
MOR 555	734 (734. Quadratojugal, jgl rms, fssa dpth) 1 0.500 0 ==> 1	n/a	1	0
MOR 555	746 (746. Quadratojugal, shaft, dv hght) 1 0.500 1 ==> 0	n/a	0	1
MOR 555	760 (760. Quadratojugal, vntrl qu pr, cdl fssa) 1 0.333 1 ==> 0	n/a	0	1
MOR 555	904 (904. Frontal, orbtl ntch, drsl vw) 1 0.400 1 ==> 2	n/a	1	0
MOR 555	912 (912. Frontal, prfntnsl pr, psnc) 1 0.250 1 ==> 0	n/a	0	1
MOR 555	951 (951. Frontal, ltrl edge, ornttn) 1 0.200 1 ==> 0	n/a	0	1
MOR 555	972 (972. Parietal, rstrltrl pr, expsr) 1 0.222 1 ==> 2	n/a	1	0
MOR 555	1020 (1020. Basioccipital, glnfrm) 1 0.250 1 ==> 0	n/a	0	1
MOR 555	1023 (1023. Basioccipital, occ con, dmpl, dpth) 1 0.200 0 ==> 1	n/a	1	0
MOR 555	1034 (1034. Basioccipital, vntrl plt, vrtcl rdg, drsl prt) 1 0.500 1 ==> 0	n/a	0	1
MOR 555	1076 (1076. Dentary, drsl rw frmna, lst frmn, hght slcs) 1 0.500 1 ==> 0	n/a	0	1
MOR 555	1088 (1088. Dentary, alvls lngth, pnt of dcrs) 1 0.333 1 ==> 0	n/a	0	1
MOR 555	1098 (1098. Dentary, js for intrcrnd nxt to alvli 3 to 5, txtr & ntch) 1 0.500 1 ==> 0	n/a	0	1
MOR 555	1104 (1104. Dentary, Mckln frmn, pstn) 1 0.500 1 ==> 0	n/a	0	1
MOR 555	1126 (1126. Dentary, cdl plt, cdl mrgn, cdl vw) 1 0.500 1 ==> 0	n/a	0	1
MOR 555	1131 (1131. Splenial, rstrl prcss, extnt rltv to alvli) 1 0.500 2 ==> 1	n/a	0	1
LACM 23844	19 (19. Maxilla, intrfnstrl strt, bs, frm (PHYLO 32)) 1 1.000 0 ==> 1	n/a	1	0
LACM 23844	118 (118. Dentary, flng rstrvntrl to Mckln frmn, prsnc (PHYLO 230)) 1 0.500 1 ==> 0	n/a	0	1
LACM 23844	132 (132. Maxilla, nmbr of tth (PHYLO 261)) 1 0.600 2 ==> 3	n/a	1	0
LACM 23844	133 (133. Dentary, nmbr of alvli (PHYLO 263)) 1 0.571 3 ==> 4	n/a	1	0
LACM 23844	330 (330. Maxilla, sbnrl frmn, dpth) 1 0.250 1 ==> 0	n/a	0	1
LACM 23844	337 (337. Maxilla, rstrdrsl srfc, frm) 1 0.333 1 ==> 0	n/a	0	1
LACM 23844	380 (380. Maxilla, aofo, rgn blw intrnl aofen, frm) 1 0.333 2 ==> 1	n/a	0	1
LACM 23844	471 (471. Lacrimal, dstl accssry rcss, frm) 1 0.600 2 ==> 1	n/a	0	1
LACM 23844	518 (518. Lacrimal, vntrl rms, rstrvntrl extnsn, prsnc) 1 0.500 1 ==> 0	n/a	0	1
LACM 23844	522 (522. Lacrimal, vntrl rms, rstrdorsal mrgn, frm) 1 0.200 1 ==> 0	n/a	0	1
LACM 23844	1121 (1121. Dentary, rdg ahd of emf) 1 0.333 1 ==> 0	n/a	0	1
LACM 23844	1184 (1184. Dentition, scnd dntry tth, frm) 1 0.667 2 ==> 1	n/a	0	1
CM 9380	26 (26. Maxilla, crcmfssa rdg, prsnc (PHYLO 45)) 1 0.333 1 ==> 0	ornament	0	1
CM 9380	100 (100. Ectopterygoid, dstl end, infltn (PHYLO 176)) 1 0.500 1 ==> 0	n/a	0	1
CM 9380	356 (356. Maxilla, intrfnstrl strt, drsl end, frm) 1 0.667 1 ==> 2	n/a	1	0
CM 9380	371 (371. Maxilla, mxllry fnstra, cddrsl mrgn, frm) 1 0.250 0 ==> 1	n/a	1	0
CM 9380	431 (431. Lacrimal, drsl rms, txtr) 1 0.400 1 ==> 2	ornament	1	0
CM 9380	516 (516. Lacrimal, sbrbtl lgmnt scr, frm) 1 0.500 0 ==> 1	n/a	1	0
CM 9380	533 (533. Lacrimal, vntrl rms, jgl str, angl) 1 0.250 0 ==> 1	n/a	1	0
CM 9380	1100 (1100. Dentary, Mckln grv, dv pstn) 1 0.500 2 ==> 1	n/a	0	1
MOR 008	377 (377. Maxilla, antrbtl fssa, accssry rcsss, prsnc) 1 0.333 0 ==> 1	n/a	1	0
MOR 2822	90 (90. Frontal, orbtl ntch, frm, ltrl vw (PHYLO 160)) 1 0.400 1 ==> 2	n/a	1	0
MOR 2822	620 (620. Postorbital, bdy, drsl mrgn, mdl vw) 1 0.400 2 ==> 1	n/a	0	1
MOR 2822	900 (900. Frontal, js for orbtsphnd, frm) 1 0.667 1 ==> 2	n/a	1	0
MOR 2822	904 (904. Frontal, orbtl ntch, drsl vw) 1 0.400 1 ==> 2	n/a	1	0
MOR 2822	924 (924. Frontal, cdl shlf, js, cdl mrgn, dpth, drsl vw) 1 0.250 1 ==> 0	n/a	0	1
MOR 2822	933 (933. Frontal, dtfo, rgn of grtst dpth) 2 0.429 3 ==> 1	n/a	0	1
MOR 2822	935 (935. Frontal, dtfo, rstrl mrgn, dstnctvnss) 1 0.250 1 ==> 0	n/a	0	1
MOR 2822	936 (936. Frontal, dtfo, rdg, prsnc) 1 0.250 1 ==> 0	n/a	0	1
MOR 2822	937 (937. Frontal, dtfo, rstrl extnt) 1 0.400 1 ==> 2	n/a	1	0
MOR 2822	942 (942. Frontal, frhd, rstrcdl ornttn) 1 0.286 1 ==> 2	n/a	1	0
MOR 2822	954 (954. Frontal, frntprtl str, ornttn) 1 0.250 1 ==> 0	n/a	0	1
UWGM 181	618 (618. Postorbital, drsl mrgn, ornttn) 1 0.250 2 ==> 1	n/a	0	1
UWGM 181	622 (622. Postorbital, mdl srfc, frm) 1 0.500 2 ==> 1	n/a	0	1
UWGM 181	895 (895. Frontal, crnl crst, js for lcrml, frm) 1 0.667 1 ==> 2	n/a	1	0
UWGM 181	916 (916. Frontal, po bttrss, lngth rltv to dtfo) 2 0.333 2 ==> 0	n/a	0	1
UWGM 181	938 (938. Frontal, dtfo, rstrl rgn, frm) 1 0.250 1 ==> 0	n/a	0	1
UWGM 181	944 (944. Frontal, js for prf, wdth) 1 0.200 1 ==> 0	n/a	0	1
FMNH PR2081	20 (20. Maxilla, antrbtl fssa, rgn blw antrbtl fnstra, hght (PHYLO 35)), 1 0.429 3 ==> 2	n/a	0	1
FMNH PR2081	406 (406. Maxilla, pltl pr, trgh, cdl-mst extnt), 1 0.667 1 ==> 2	n/a	1	0
FMNH PR2081	431 (431. Lacrimal, drsl rms, txtr), 1 0.400 1 ==> 2	ornament	1	0
FMNH PR2081	516 (516. Lacrimal, sbrbtl lgmnt scr, frm), 1 0.500 0 ==> 1	n/a	1	0
FMNH PR2081	525 (525. Lacrimal, vntrl rms, mdl srfc, slci, prsnc), 1 0.500 1 ==> 0	n/a	0	1
FMNH PR2081	530 (530. Lacrimal, rstrvntrl ala, js pltn, pstn), 1 0.400 1 ==> 0	n/a	0	1
FMNH PR2081	602 (602. Postorbital, dtfo, crs btwn bttrss & shlf), 1 0.500 1 ==> 0	n/a	0	1
FMNH PR2081	627 (627. Postorbital, crnl pr, dtfo intrrptn), 1 0.500 1 ==> 0	ornament	0	1
FMNH PR2081	646 (646. Postorbital, orbt mrgn, frmn), 1 0.400 1 ==> 2	n/a	1	0
FMNH PR2081	701 (701. Squamosal, qu ctyl, txtr) , 1 0.667 2 ==> 1	n/a	0	1
FMNH PR2081	734 (734. Quadratojugal, jgl rms, fssa dpth), 1 0.500 0 ==> 1	n/a	1	0
FMNH PR2081	903 (903. Frontal, orbtl ntch, frm, vntrl vw), 1 0.500 1 ==> 0	n/a	0	1
FMNH PR2081	914 (914. Frontal, js for prf, dstnc from orbtl ntch), 1 0.250 1 ==> 0	n/a	0	1
FMNH PR2081	956 (956. Frontal, rdg prlll to frntprtl cntct), 1 0.200 1 ==> 0	n/a	0	1
FMNH PR2081	1037 (1037. Basioccipital, bstbrl web, vntrl mrgn, frmn, prnsc), 1 0.500 1 ==> 0	n/a	0	1
FMNH PR2081	1219 (1219. Axis, axl intrcntrm, antrr js, frm), 1 0.600 2 ==> 3	n/a	1	0
FMNH PR2081	1220 (1220. Axis, axl intrcntrm, antrr js, vntrl mrgn, sptrn), 1 1.000 1 ==> 2	n/a	1	0
FMNH PR2081	1227 (1227. Axis, axl intrcntrm, shp, vntrl vw), 1 0.667 1 ==> 2	n/a	1	0
FMNH PR2081	1230 (1230. Axis, axl intrcntrm, vntrl srfc, ltrl extnt) , 1 0.500 0 ==> 1	n/a	1	0
FMNH PR2081	431 (431. Lacrimal, drsl rms, txtr) 1 0.400 1 ==> 2
FMNH PR2081	20 (20. Maxilla, antrbtl fssa, rgn blw antrbtl fnstra, hght (PHYLO 35)) 1 0.429 3 ==> 2
FMNH PR2081	406 (406. Maxilla, pltl pr, trgh, cdl-mst extnt) 1 0.667 1 ==> 2
FMNH PR2081	431 (431. Lacrimal, drsl rms, txtr) 1 0.400 1 ==> 2
FMNH PR2081	516 (516. Lacrimal, sbrbtl lgmnt scr, frm) 1 0.500 0 ==> 1
FMNH PR2081	525 (525. Lacrimal, vntrl rms, mdl srfc, slci, prsnc) 1 0.500 1 ==> 0
FMNH PR2081	530 (530. Lacrimal, rstrvntrl ala, js pltn, pstn) 1 0.400 1 ==> 0
FMNH PR2081	602 (602. Postorbital, dtfo, crs btwn bttrss & shlf) 1 0.500 1 ==> 0
FMNH PR2081	627 (627. Postorbital, crnl pr, dtfo intrrptn) 1 0.500 1 ==> 0
FMNH PR2081	646 (646. Postorbital, orbt mrgn, frmn) 1 0.400 1 ==> 2
FMNH PR2081	701 (701. Squamosal, qu ctyl, txtr) 1 0.667 2 ==> 1
FMNH PR2081	734 (734. Quadratojugal, jgl rms, fssa dpth) 1 0.500 0 ==> 1
FMNH PR2081	903 (903. Frontal, orbtl ntch, frm, vntrl vw) 1 0.500 1 ==> 0
FMNH PR2081	914 (914. Frontal, js for prf, dstnc from orbtl ntch) 1 0.250 1 ==> 0
FMNH PR2081	956 (956. Frontal, rdg prlll to frntprtl cntct) 1 0.200 1 ==> 0
FMNH PR2081	1037 (1037. Basioccipital, bstbrl web, vntrl mrgn, frmn, prnsc) 1 0.500 1 ==> 0
FMNH PR2081	1219 (1219. Axis, axl intrcntrm, antrr js, frm) 1 0.600 2 ==> 3
FMNH PR2081	1220 (1220. Axis, axl intrcntrm, antrr js, vntrl mrgn, sptrn) 1 1.000 1 ==> 2
FMNH PR2081	1227 (1227. Axis, axl intrcntrm, shp, vntrl vw) 1 0.667 1 ==> 2
FMNH PR2081	1230 (1230. Axis, axl intrcntrm, vntrl srfc, ltrl extnt) 1 0.500 0 ==> 1
